# Supplementary material
Source: PubMed Central journal article supplement (PMC7659557)
Supplement: mmc1.pdf [file mmc1.pdf]

Cell Reports Medicine, Volume 1

## Supplemental Information

**Microbiota Supplementation with *Bifidobacterium***

**and *Lactobacillus* Modifies the Preterm Infant Gut**

**Microbiota and Metabolome: An Observational Study**

**Cristina Alcon-Giner, Matthew J. Dalby, Shabhonam Caim, Jennifer Ketskemety, Alex Shaw, Kathleen Sim, Melissa A.E. Lawson, Raymond Kiu, Charlotte Leclaire, Lisa Chalklen, Magdalena Kujawska, Suparna Mitra, Fahmina Fardus-Reid, Gustav Belteki, Katherine McColl, Jonathan R. Swann, J. Simon Kroll, Paul Clarke, and Lindsay J. Hall**

**Table S1: Summary statistics for preterms recruited in the study. Related to Figure 1.**

|                                                  | Group            |                  | p-value |
|--------------------------------------------------|------------------|------------------|---------|
|                                                  | Control          | Bif/Lacto        |         |
| <b>n</b>                                         | <b>133</b>       | <b>101</b>       |         |
| <b>Sex (n (%))</b>                               |                  |                  |         |
| <i>Female</i>                                    | 75 (56.4)        | 45 (44.6)        | 0.096   |
| <i>Male</i>                                      | 58 (43.6)        | 56 (55.4)        |         |
| <b>Delivery (n (%))</b>                          |                  |                  |         |
| <i>Vaginal</i>                                   | 61 (45.9)        | 46 (45.5)        | 1       |
| <i>Cesarean</i>                                  | 72 (54.1)        | 55 (54.5)        |         |
| <b>Birthweight in grams (mean (SD))</b>          | 1146.02 (337.19) | 1127.17 (311.97) | 0.662   |
| <b>Gestational age in weeks (mean (SD))</b>      | 28.35 (2.29)     | 28.55 (2.77)     | 0.545   |
| <b>Length of NICU stay (days) (mean (SD))</b>    | 45.86 (22.79)    | 53.06 (32.71)    | 0.055   |
| <b>Length of antibiotics (n (%))</b>             |                  |                  |         |
| <i>Long</i>                                      | 25 (18.8)        | 42 (41.6)        | 0.001   |
| <i>Short</i>                                     | 94 (70.7)        | 54 (53.5)        |         |
| <i>None</i>                                      | 13 (9.8)         | 5 (5.0)          |         |
| <i>NA</i>                                        | 1 (0.8)          | 0 (0.0)          |         |
| <b>Hospital (n (%))</b>                          |                  |                  |         |
| <i>Norfolk and Norwich</i>                       | -                | 101 (100.0)      |         |
| <i>St Mary's</i>                                 | 65 (48.9)        | -                |         |
| <i>Queen Charlotte's</i>                         | 54 (40.6)        | -                |         |
| <i>Addenbrookes</i>                              | 14 (10.5)        | -                |         |
| <b>Total diet composition (n (%))</b>            |                  |                  |         |
| <i>Breast milk</i>                               | 36 (27.1)        | 70 (69.3)        | <0.001  |
| <i>Breast milk + Donor breast milk</i>           | 68 (51.1)        | 7 (6.9)          |         |
| <i>Breast milk + Formula</i>                     | 13 (9.8)         | 14 (13.9)        |         |
| <i>Breast milk + Donor breast milk + Formula</i> | 13 (9.8)         | 5 (5.0)          |         |
| <i>Donor milk</i>                                | 0 (0.0)          | 1 (1.0)          |         |
| <i>Formula</i>                                   | 3 (2.3)          | 4 (4.0)          |         |

n = number of infants.

SD = standard deviation.

Length of antibiotics: Short (< 3days); Long (> 3 days).

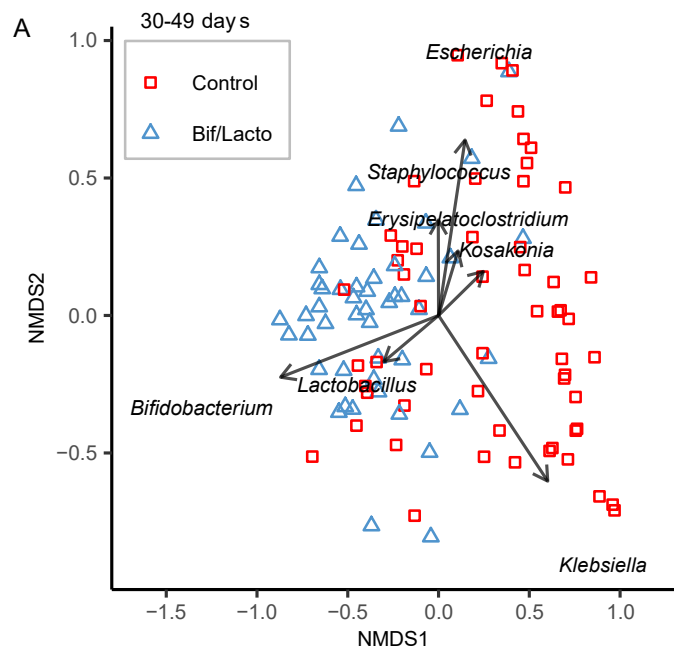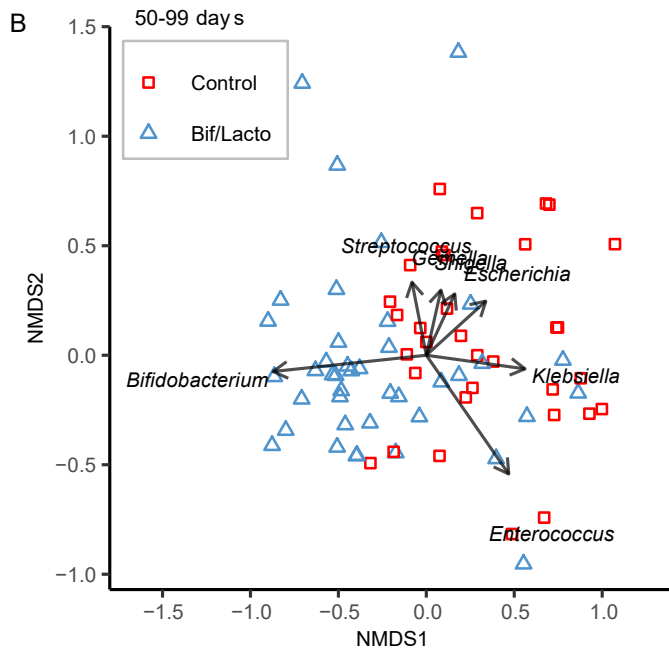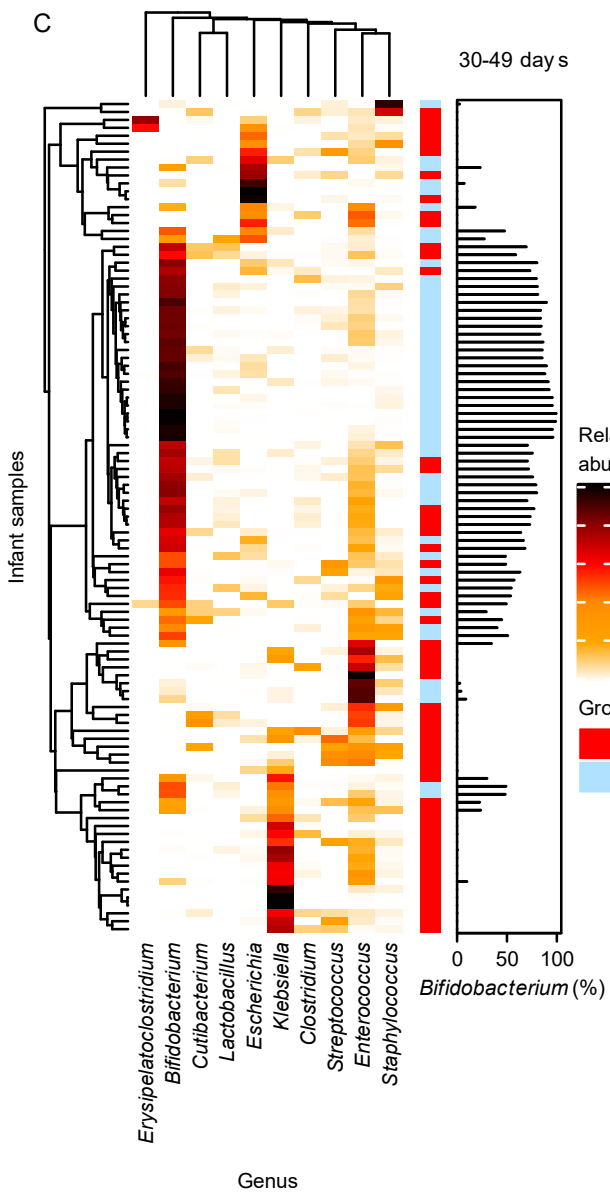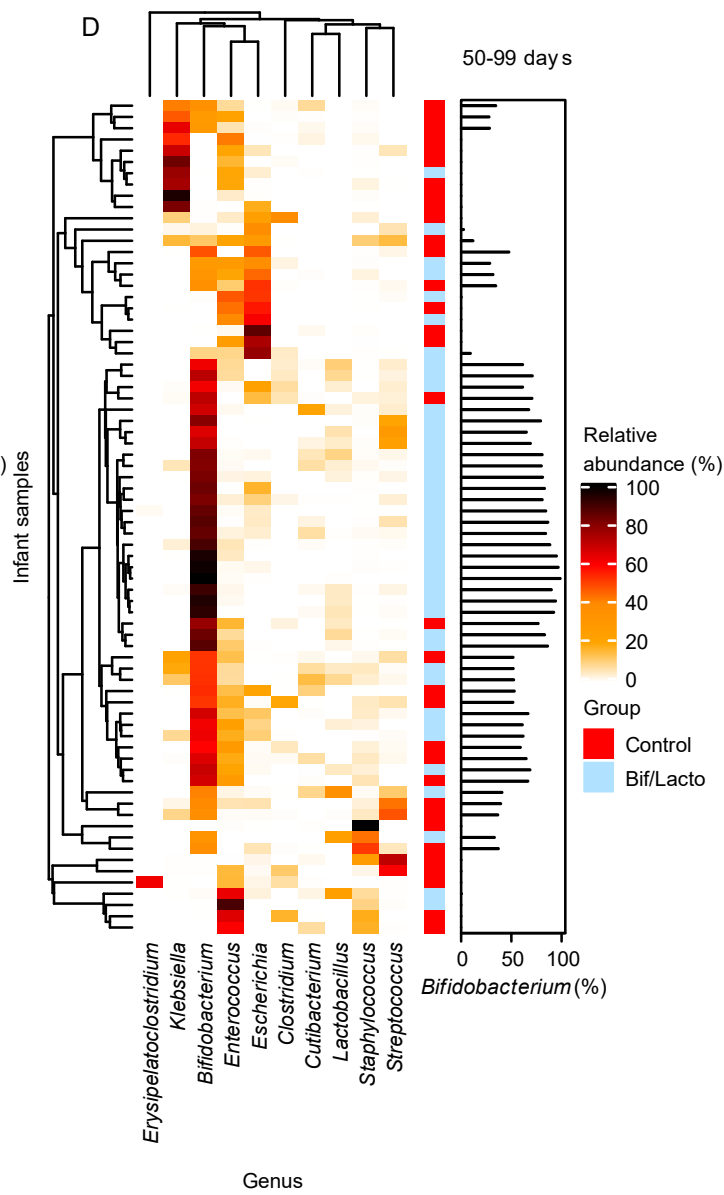

**Figure S1 related to Figure 1. Clustering of samples and genus composition.**

(A) NMDS plot clustered with a Bray-Curtis dissimilarity of infant fecal microbiota similarity at 30-49 days (Bif/Lacto: n = 50, Control: n = 63).

(B) NMDS plot clustered with a Bray-Curtis dissimilarity of infant fecal microbiota similarity at 50-99 days (Bif/Lacto: n = 43, Control: n = 35).

Arrows indicate bacterial genera driving the separation of points on the NMDS plots.

(C) Heatmap with the ten genera with highest relative abundance at 30-49 days of age.

(D) Heatmap with the ten genera with highest relative abundance at 50-99 days of age.

Heatmap rows were clustered using Bray-Curtis dissimilarity. Side bar plots show the proportional abundance of *Bifidobacterium* in each sample.

Related to Figure 1.

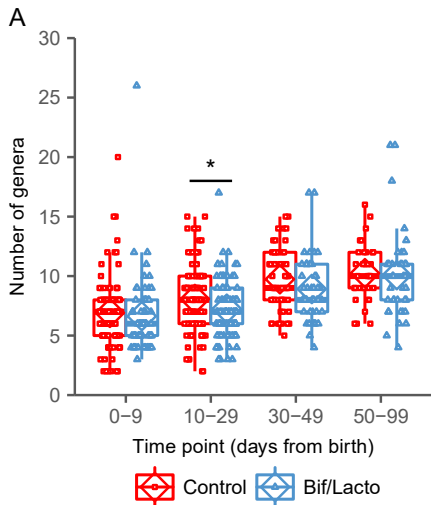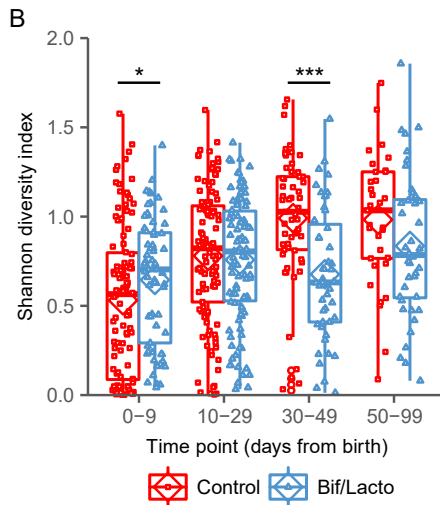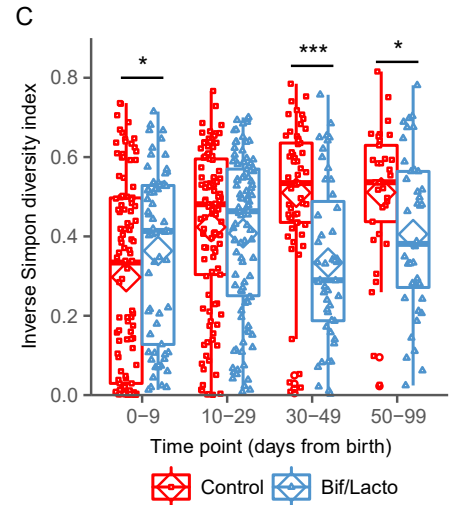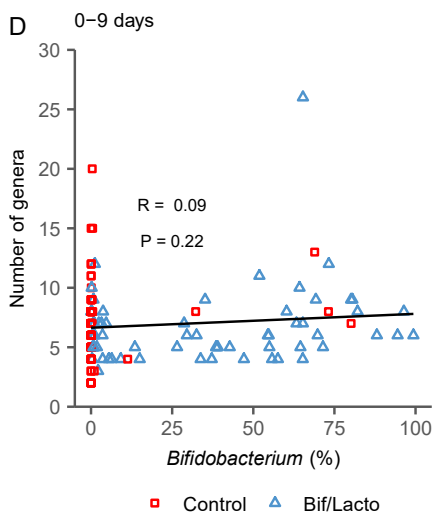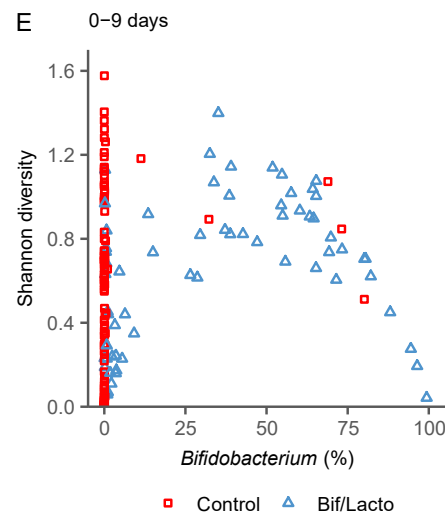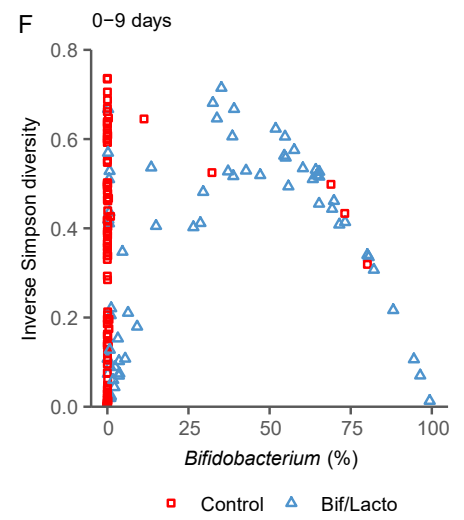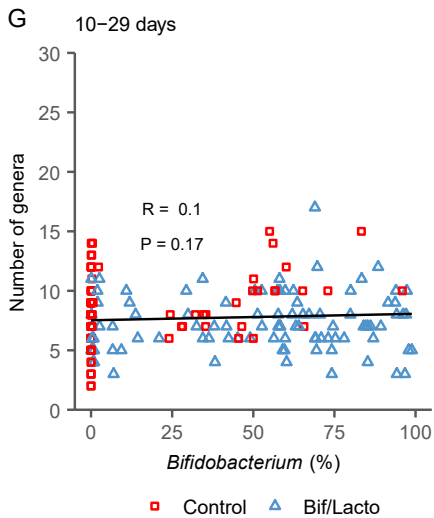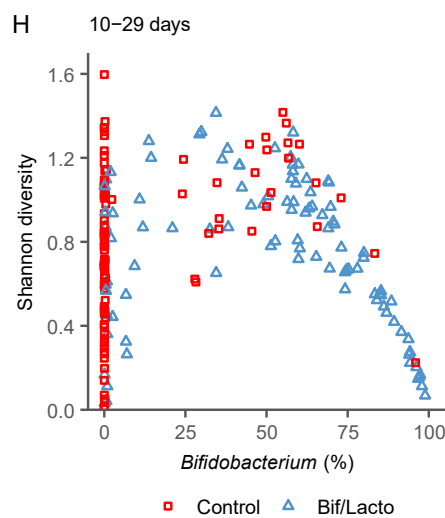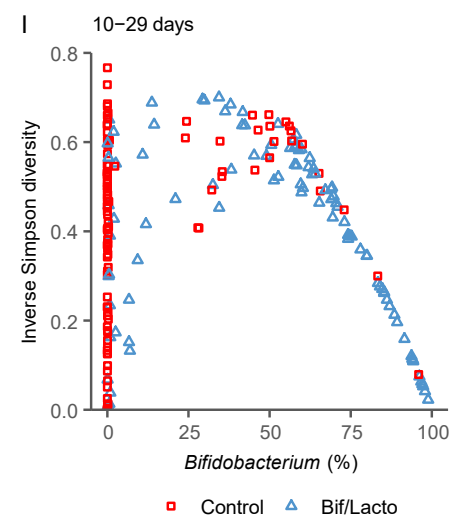

**Figure S2 related to Figure 2. Microbiota diversity.**

(A) Number of genera detected in each infant sample.

(B) Shannon diversity index of each infant sample.

(C) Inverse Simpson diversity index of each infant sample.

(D) Number of genera against *Bifidobacterium* abundance at 0-9 days.

(E) Shannon diversity against *Bifidobacterium* abundance at 0-9 days.

(F) Inverse Simpson diversity against *Bifidobacterium* abundance at 0-9 days.

(G) Number of genera against *Bifidobacterium* abundance at 10-29 days.

(H) Shannon diversity against *Bifidobacterium* abundance at 10-29 days.

(I) Inverse Simpson diversity *Bifidobacterium* abundance at 10-29 days.

Individual points show each infant sample, the diamond indicates the group mean, box plots show median and interquartile ranges.

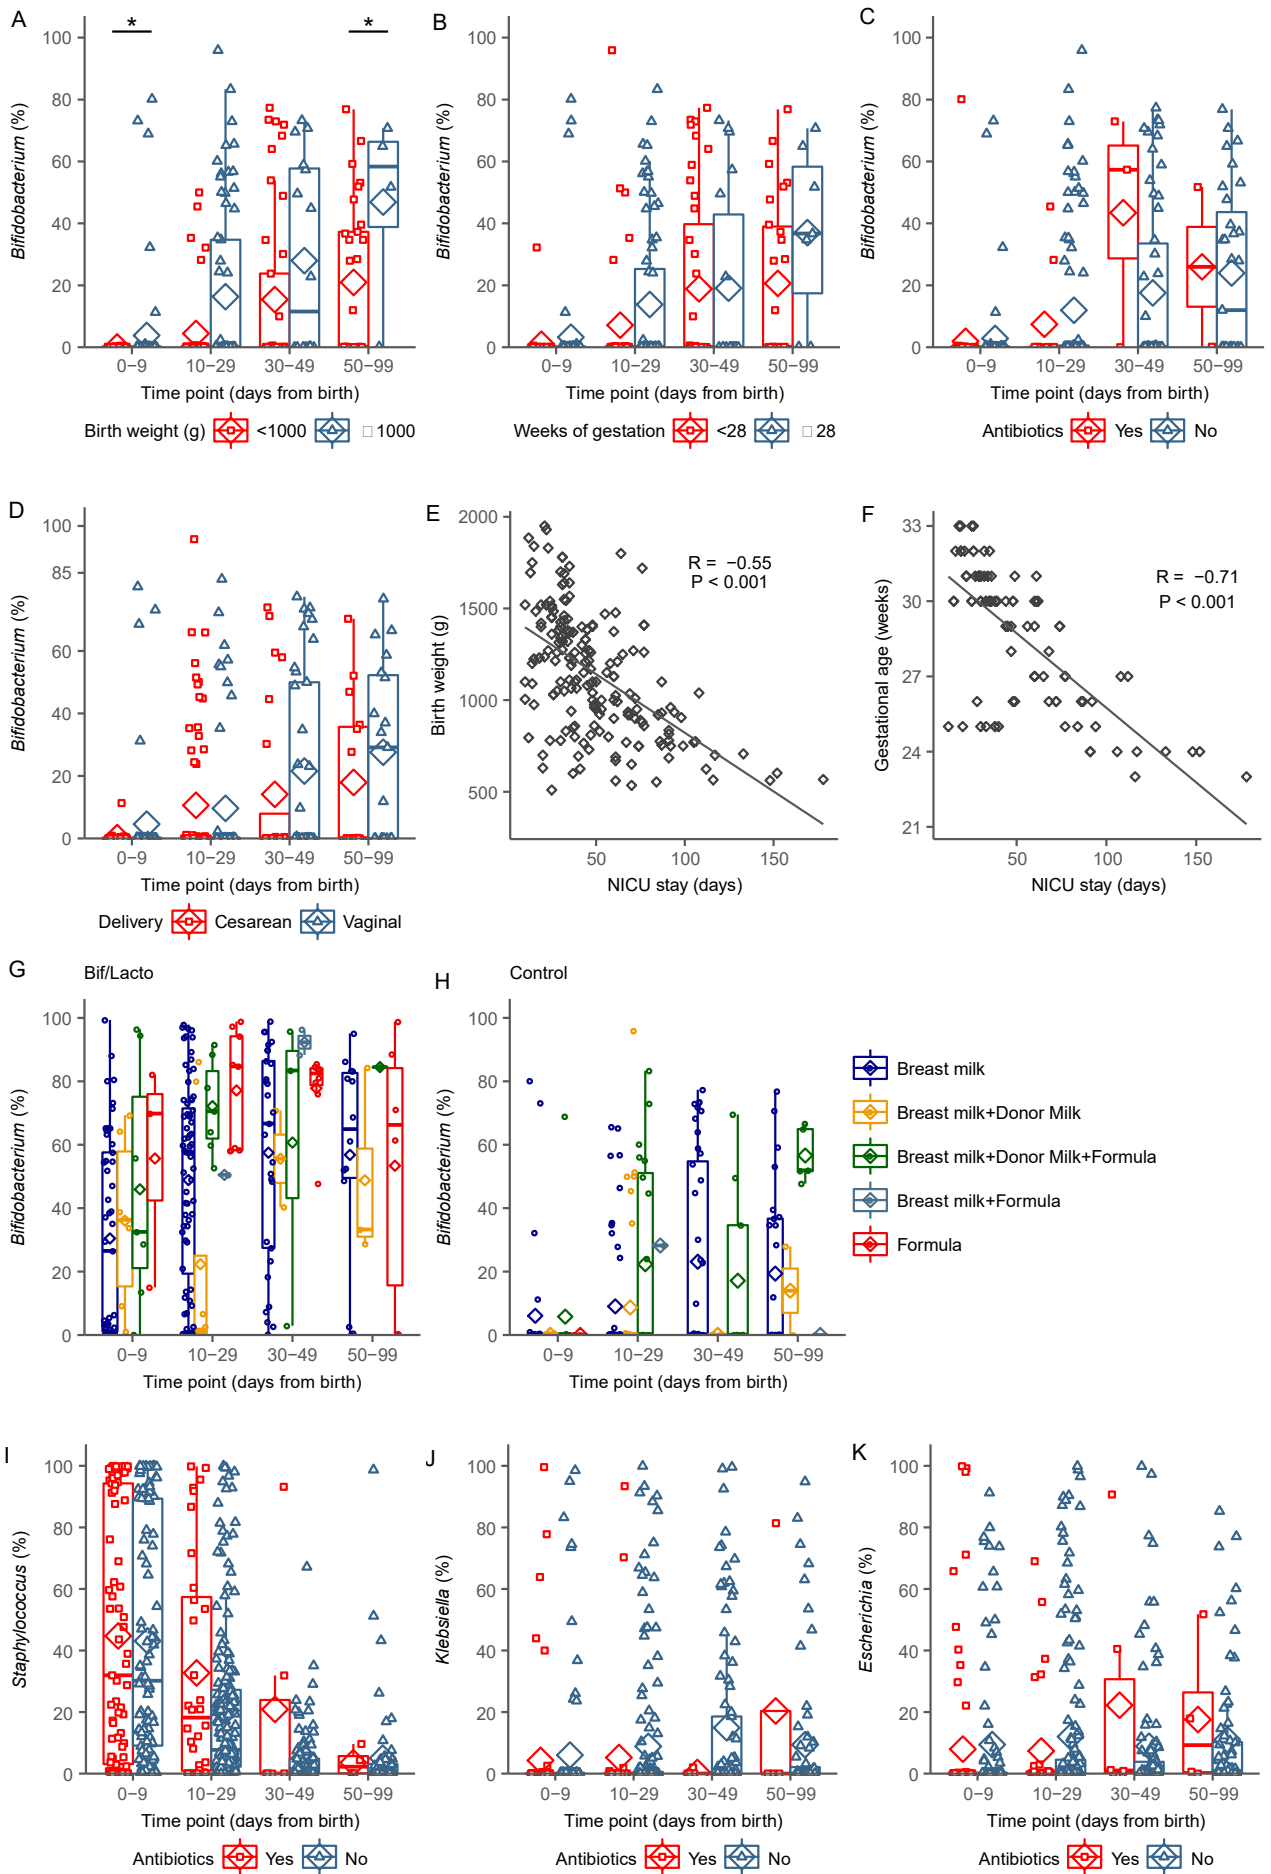

**Figure S3 related to Figure 2: Effects of birthweight, antibiotics, delivery mode and diet on *Bifidobacterium*.**

- (A) *Bifidobacterium* abundance in Control infants by birth weight.
- (B) *Bifidobacterium* abundance in Control infants by gestational age.
- (C) *Bifidobacterium* abundance in Control infants receiving antibiotics at the time of sample collection.
- (D) *Bifidobacterium* abundance in Control infants delivered by caesarean or vaginal birth.
- (E) Birth weight correlated with length of stay in NICU in all infants.
- (F) Gestational age correlated with length of stay in NICU in all infants.
- (G) Bif/Lacto group *Bifidobacterium* abundance by diet group.
- (H) Control group *Bifidobacterium* abundance by diet group.
- (I) *Staphylococcus* abundance in all infants receiving antibiotics at the time of sample collection.
- (J) *Klebsiella* abundance in in all infants receiving antibiotics at the time of sample collection.
- (K) *Escherichia* abundance in in all infants receiving antibiotics at the time of sample collection.

Individual points show each infant sample, the diamond indicates the group mean, box plots show median and interquartile ranges. Asterisks represent  $p$  values: \* $P < 0.05$ .



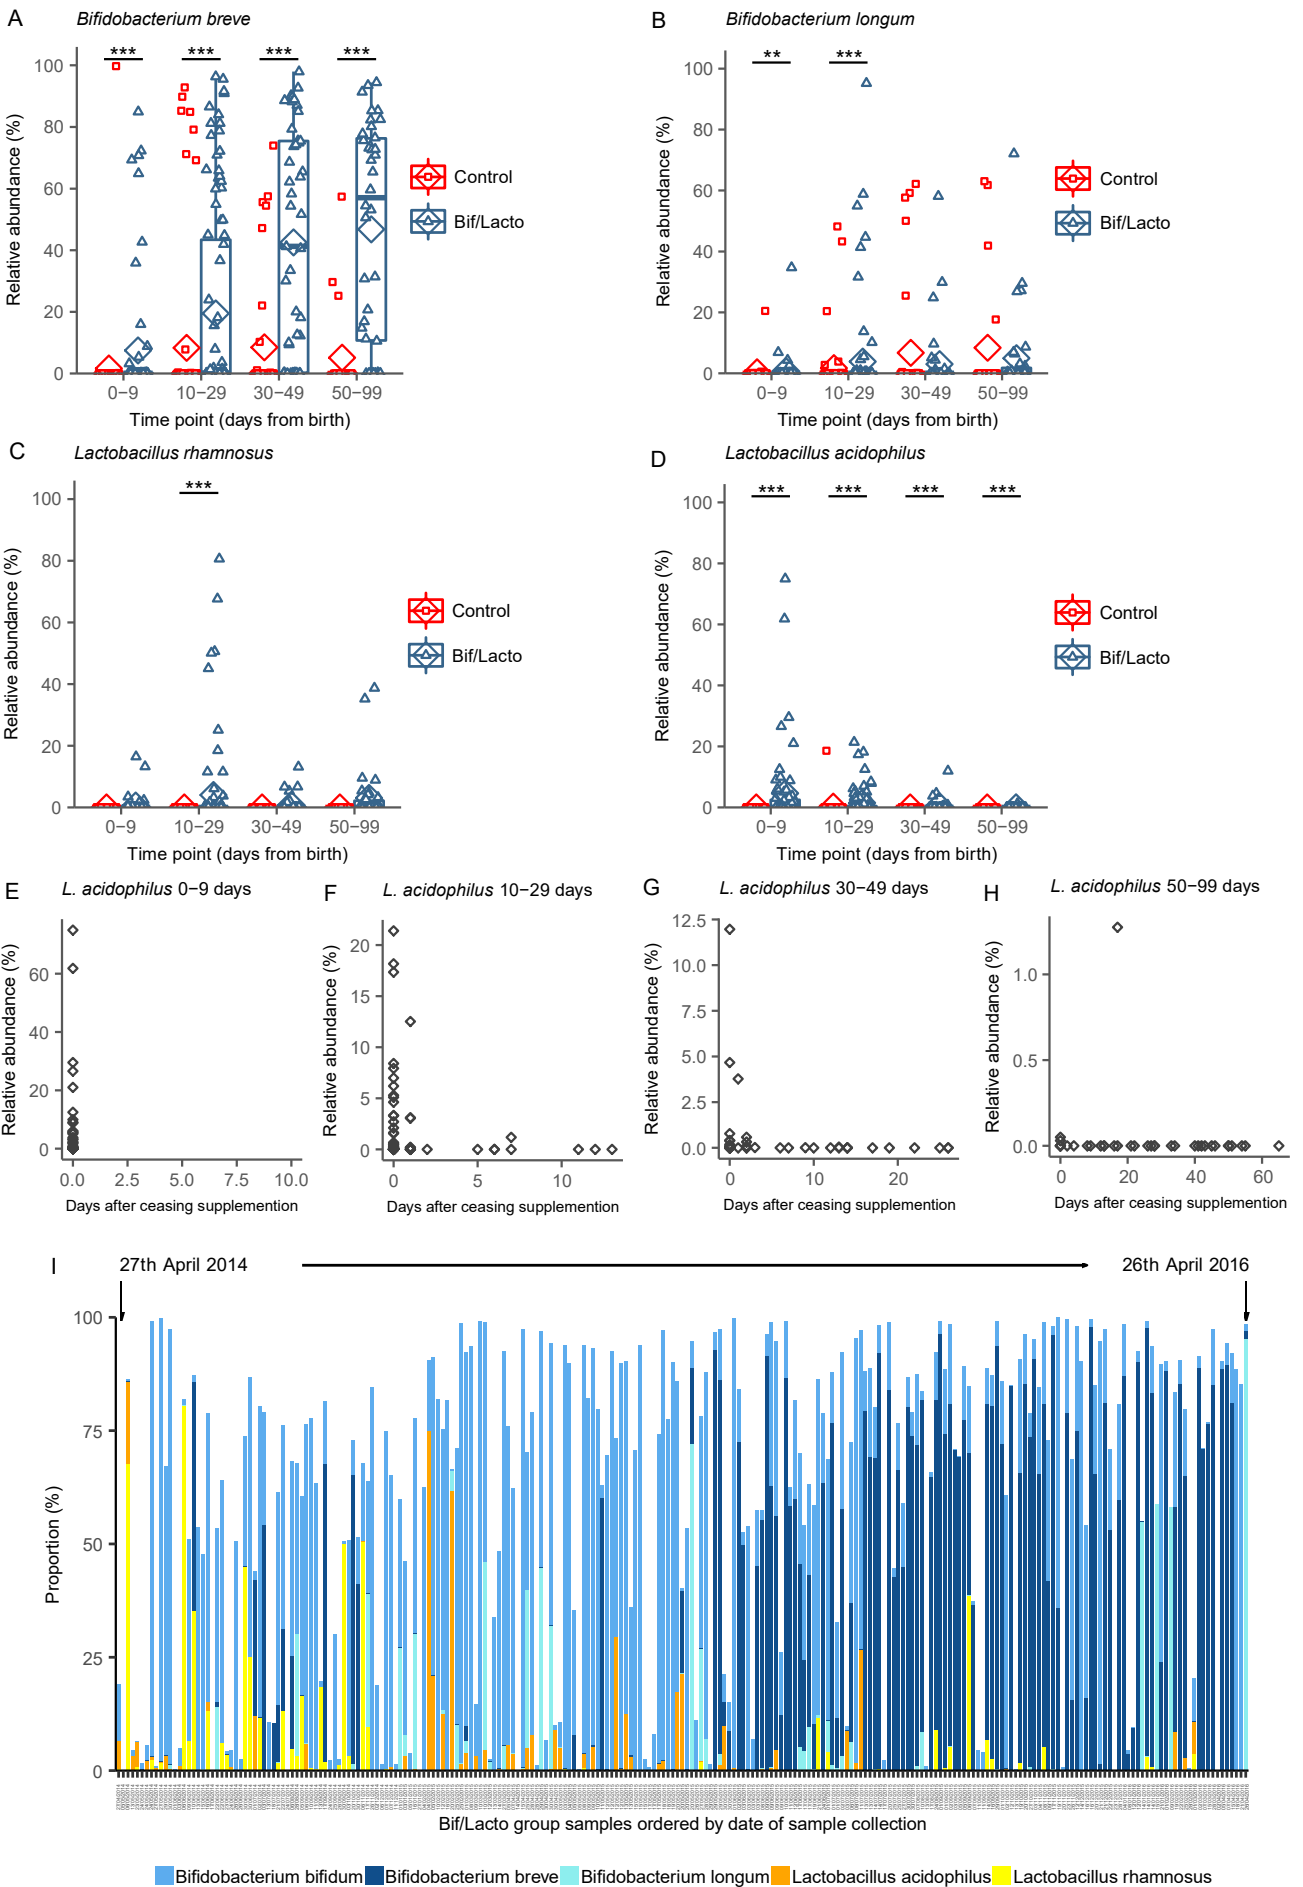

**Figure S4 related to Figure 4. *Bifidobacterium* species level abundance and over time.**

(A) *Bifidobacterium breve* proportional abundance.

(B) *Bifidobacterium longum* proportional abundance.

(C) *Lactobacillus rhamnosus* proportional abundance.

(D) *Lactobacillus acidophilus* proportional abundance.

(E-H) Correlation between *Lactobacillus acidophilus* abundance and days after ceasing receiving supplementation.

(I) *Bifidobacterium* and *Lactobacillus* species abundance in Bif/Lacto infant samples arranged in chronological order by date of sample collection.

Individual points show each infant sample, the diamond indicates the group mean, box plots show median and interquartile ranges. Asterisks represent  $p$  values: \* $P < 0.05$ , \*\* $P < 0.01$ , \*\*\* $P < 0.001$

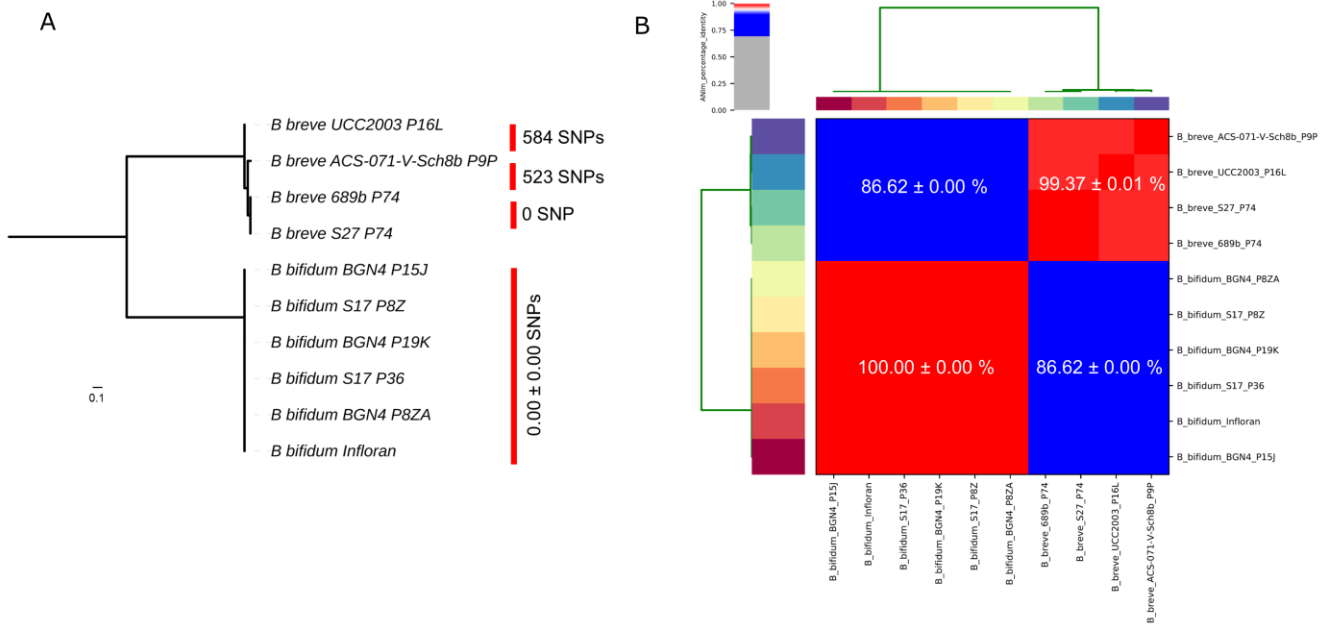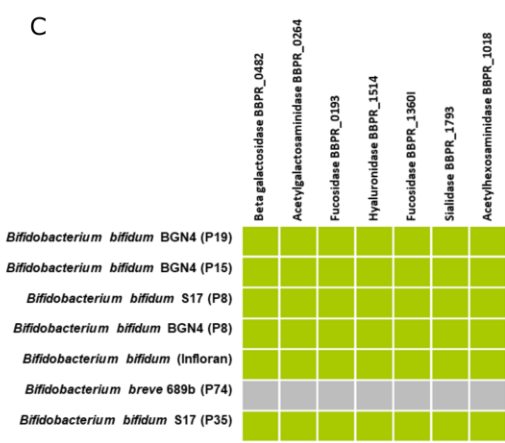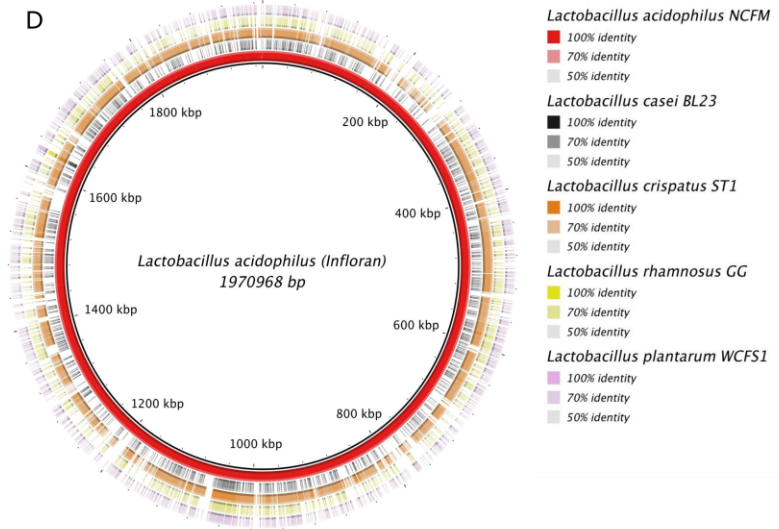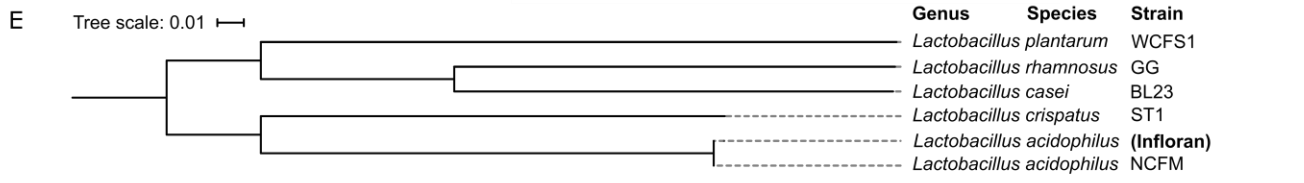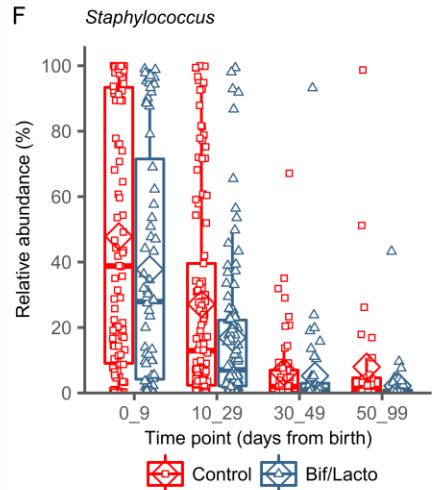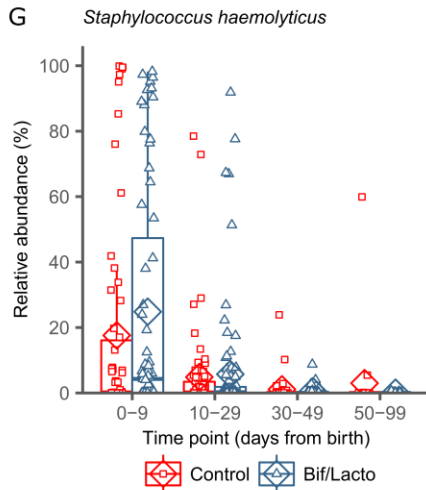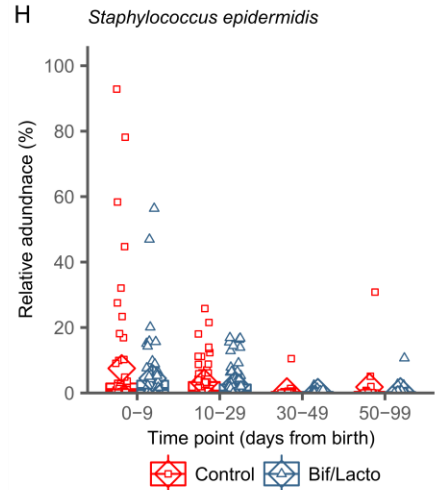

**Figure S5 related to Figure 4. *Lactobacillus* genome comparison and *Staphylococcus* species.**

(A) Mid-point rooted maximum-likelihood tree based on 6,202 SNPs in 87 core genes from 10 *Bifidobacterium* genomes.

(B) Average Nucleotide Identity pairwise comparison between 10 *Bifidobacterium* strains. Data: mean  $\pm$  S.D.

(C) Heat map representing *B. bifidum* genes involved in mucin degradation.

(D) Circular genome diagrams from *Lactobacillus acidophilus* present in the oral supplementation and a subset of five *Lactobacillus* species from NCBI database. Similarity was calculated using BLAST.

(E) Core genome tree comparison from *Lactobacillus* present in the oral supplementation and five other *Lactobacillus* species from NCBI database which were found most abundant in the 16S rRNA gene data. Roary core gene alignment output was used to create a maximum likelihood (ML) phylogenetic tree.

(F) *Staphylococcus* genus relative abundance.

(G) *Staphylococcus haemolyticus* relative abundance.

(H) *Staphylococcus epidermis* relative abundance.

**A**

| Timepoint | n   | Q2Y      | p    |
|-----------|-----|----------|------|
| 1         | 38  | 0.562(1) | 0.01 |
| 2         | 44  | 0.652(0) | 0.01 |
| 3         | 44  | 0.520(1) | 0.01 |
| 4         | 24  | 0.465(0) | 0.01 |
| Combined  | 157 | 0.587(1) | 0.01 |

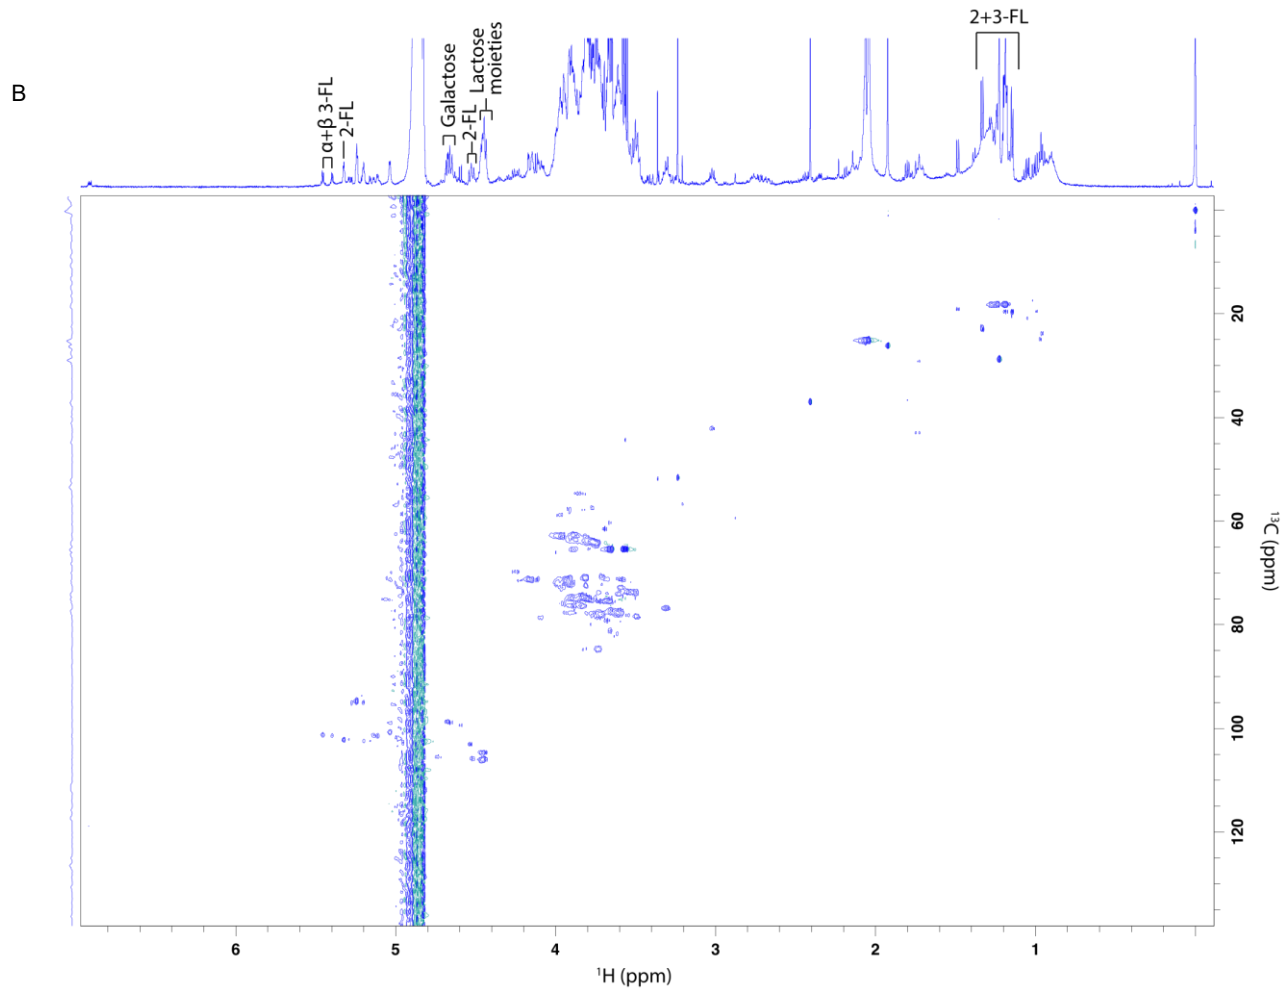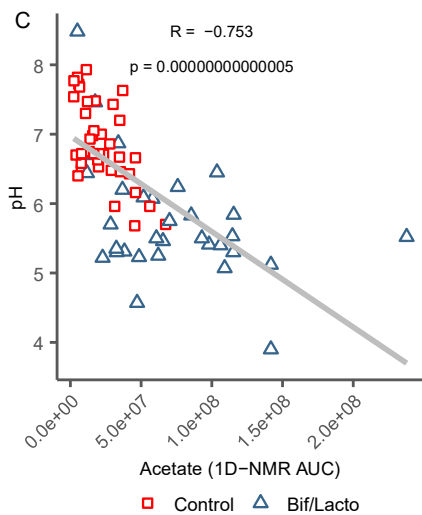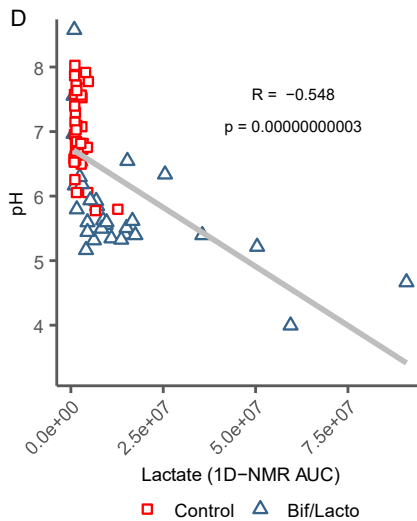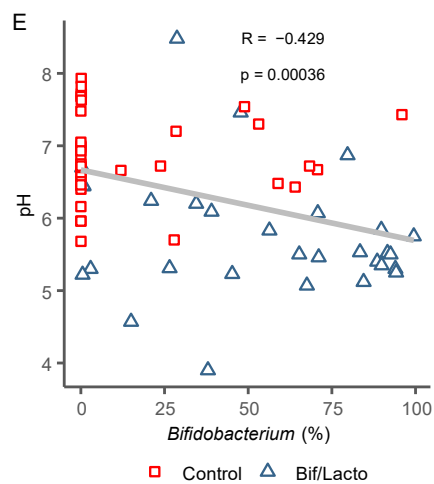

**Figure S6 related to Figure 5. OPLS-DA model comparing the fecal  $^1\text{H}$  NMR spectra of the Bif/Lacto Group and Control Group, and 2D-NMR analysis**

(A) Predictive performance (Q<sup>2</sup>Y) and *p* values of the Orthogonal Projections to Latent Structures Discriminant Analysis (OPLS-DA) models comparing the Bif/Lacto and Control fecal profiles at individual time points and all timepoints combined.

(B) HSQC 2D-NMR spectrum from a study fecal sample.

(C) Spearman correlation between fecal acetate and fecal pH.

(D) Correlation between fecal lactate and fecal pH.

(E) Correlation between percentage of *Bifidobacterium* and fecal pH.

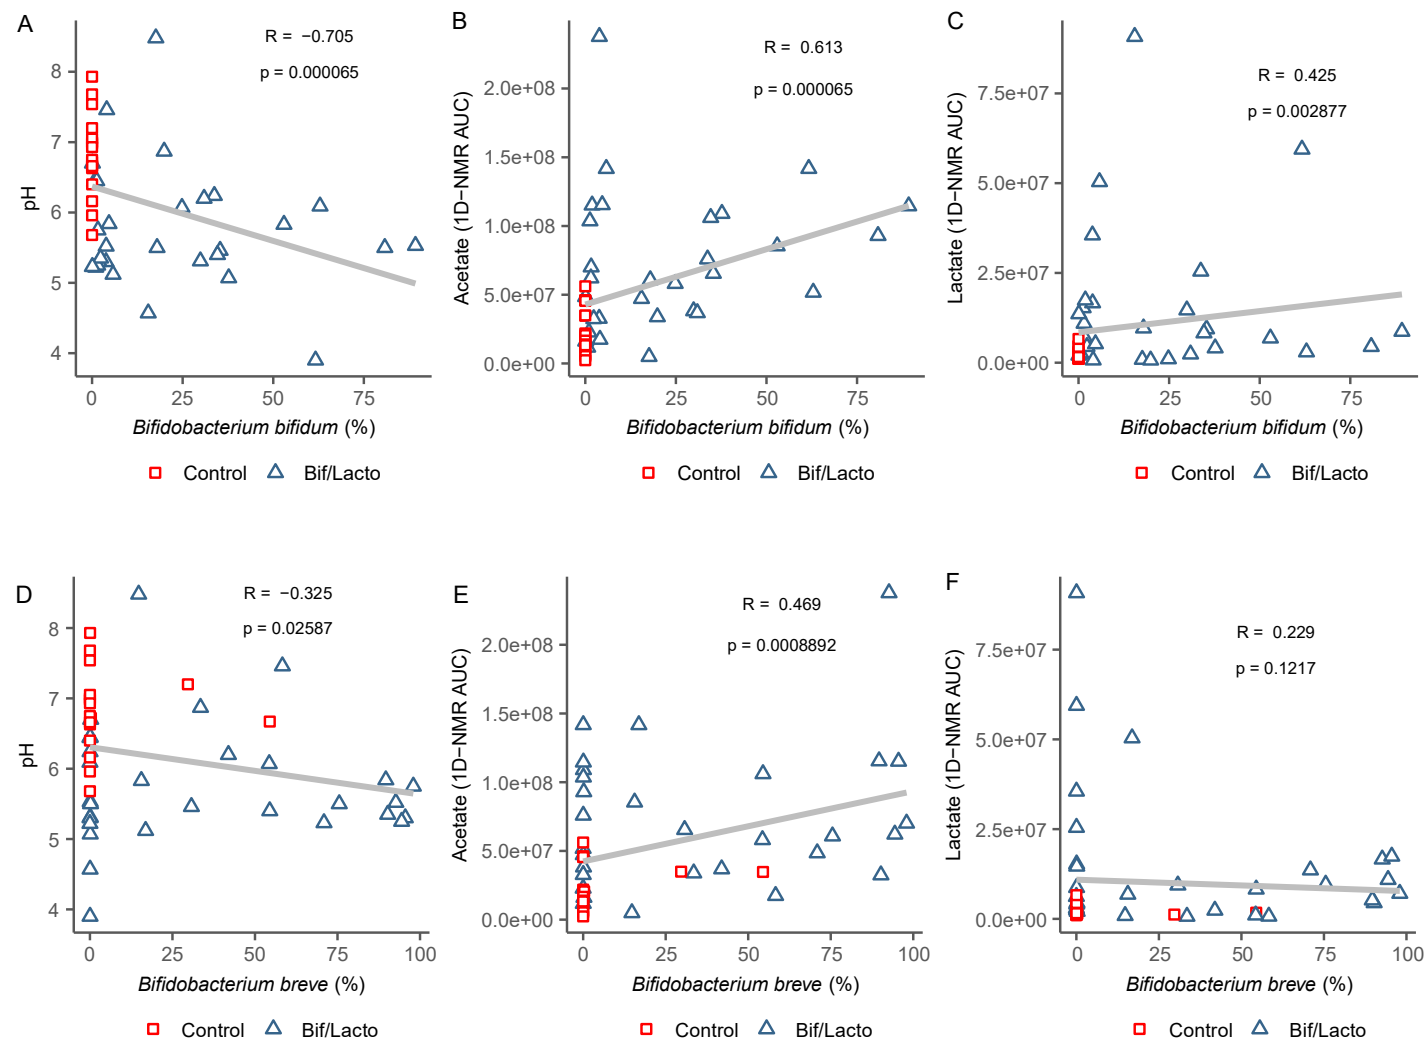

**G**

— *Bifidobacterium bifidum* (Infloran)

— Control

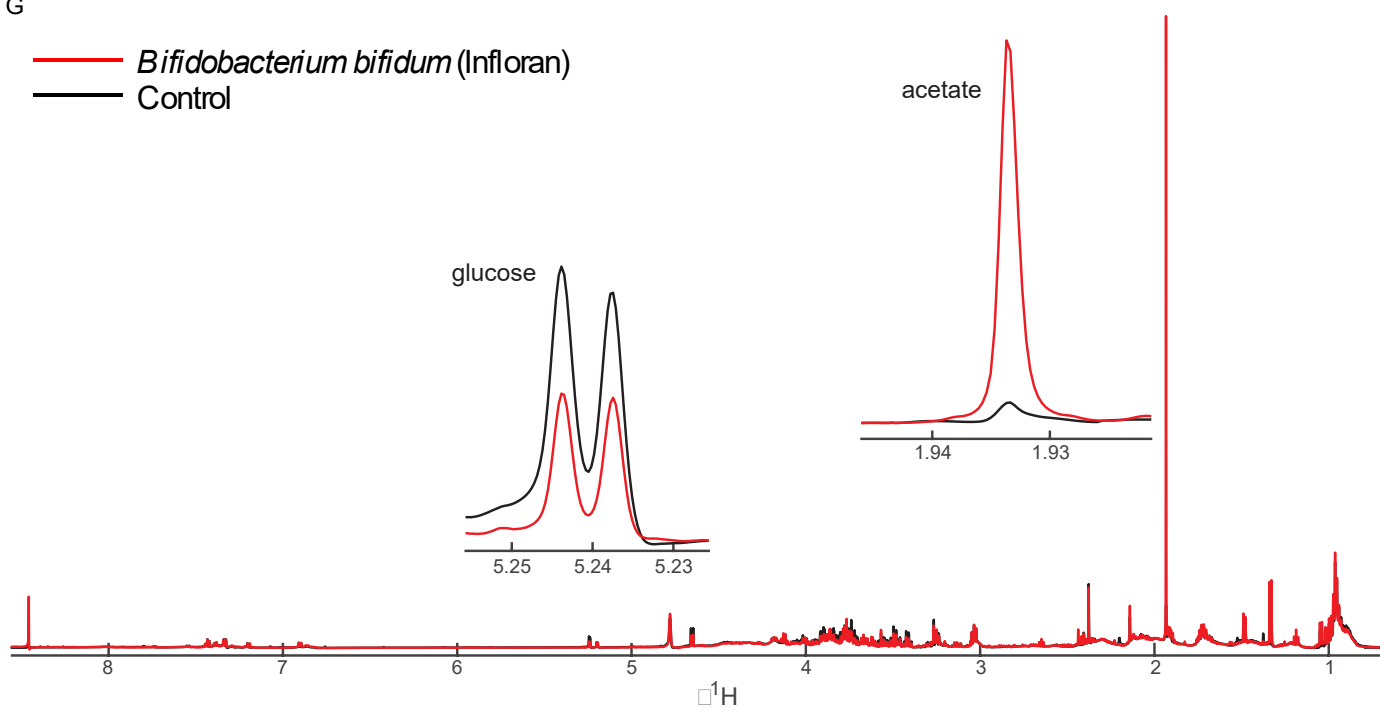

**Figure S7 related to Figure 5.  $^1\text{H-NMR}$  AUC acetate levels found in Bif/Lacto Group and Control Group.**

(A) Correlation between relative abundance of *Bifidobacterium bifidum* and fecal pH.

(B) Correlation between relative abundance of *B. bifidum* and fecal acetate.

(C) Correlation between relative abundance of *B. bifidum* and fecal lactate.

(D) Correlation between relative abundance of *Bifidobacterium breve* and fecal pH.

(E) Correlation between relative abundance of *B. breve* and fecal acetate.

(F) Correlation between relative abundance of *B. breve* and fecal lactate.

(G)  $^1\text{H}$  NMR spectra of the culture media from *Bifidobacterium bifidum* Infloran (red) and negative control (black).



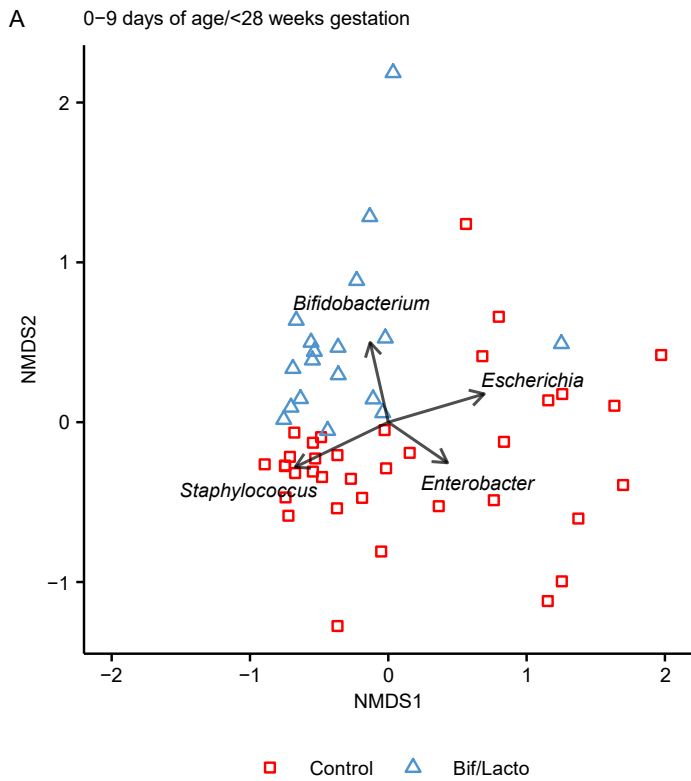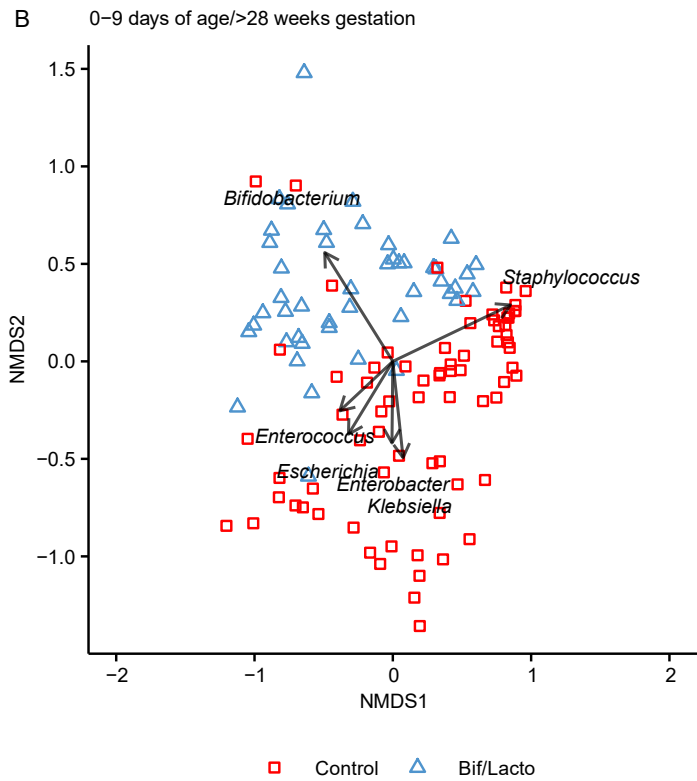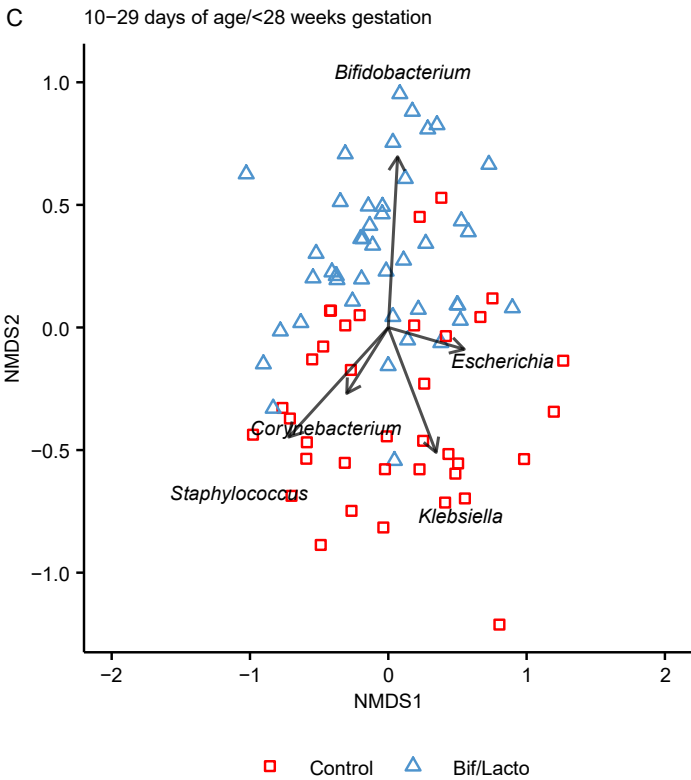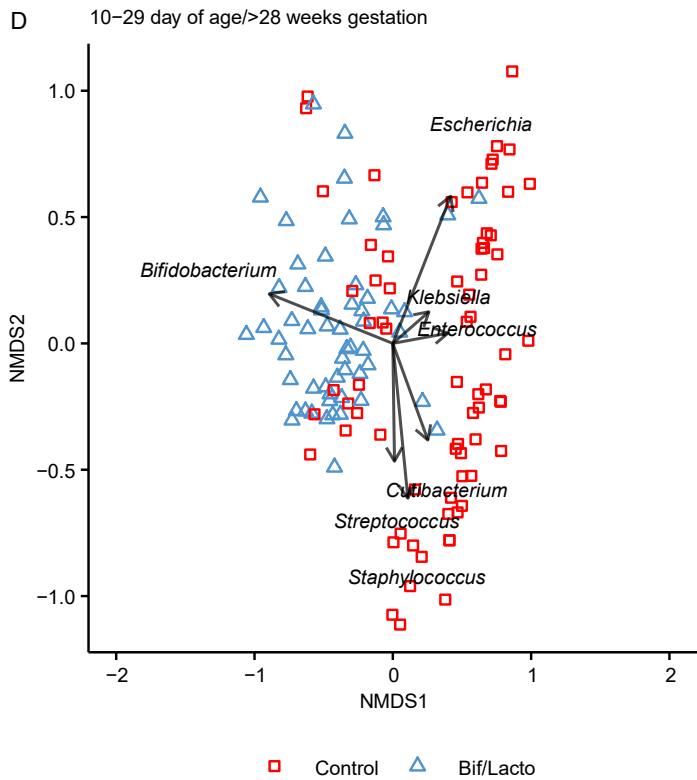

**Data S1 related to Figure 1. Microbiota composition at in infants born under or at or about 28 weeks gestational age.**

(A) NMDS plot at 0-9 days for infants under 28 weeks gestational age (PERMANOVA:  $R^2 = 4.6$ ,  $P = 0.03$ ).

(B) NMDS plot at 0-9 days for infants over 28 weeks gestational age (PERMANOVA:  $R^2 = 10.6$ ,  $P < 0.001$ ).

(C) NMDS plot at 10-29 days for infants under 28 weeks gestational age (PERMANOVA:  $R^2 = 9.7$ ,  $P < 0.001$ ).

(D) NMDS plot at 10-29 days for infants over 28 weeks gestational age (PERMANOVA:  $R^2 = 16.6$ ,  $P < 0.001$ ).

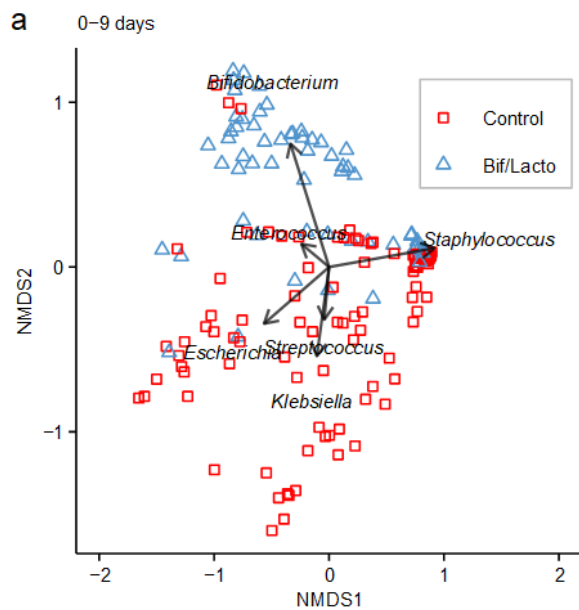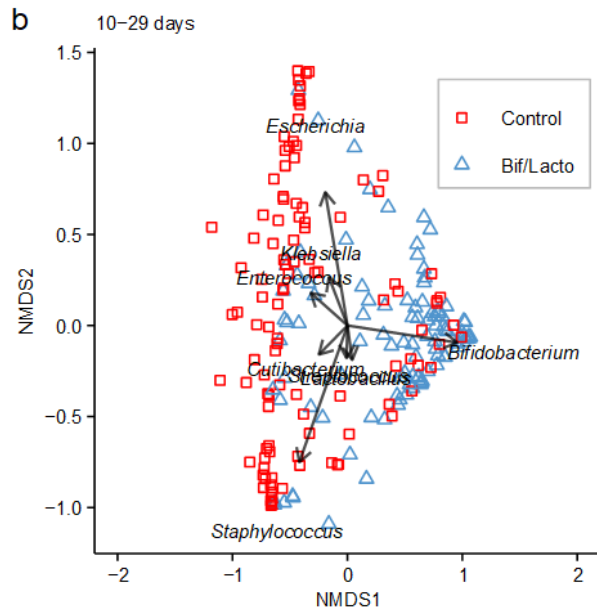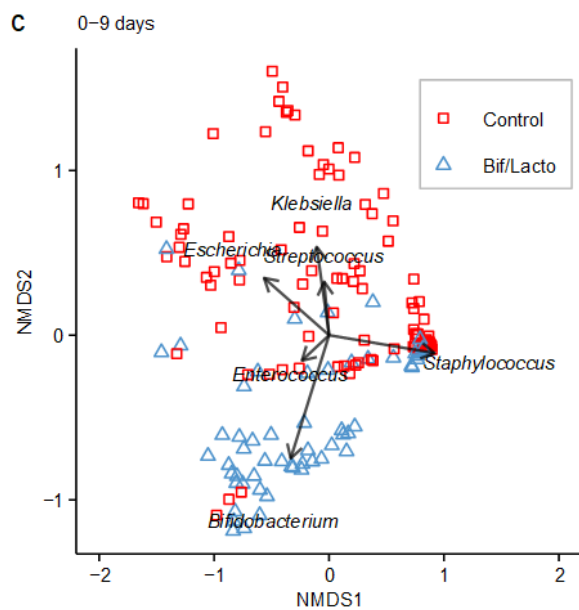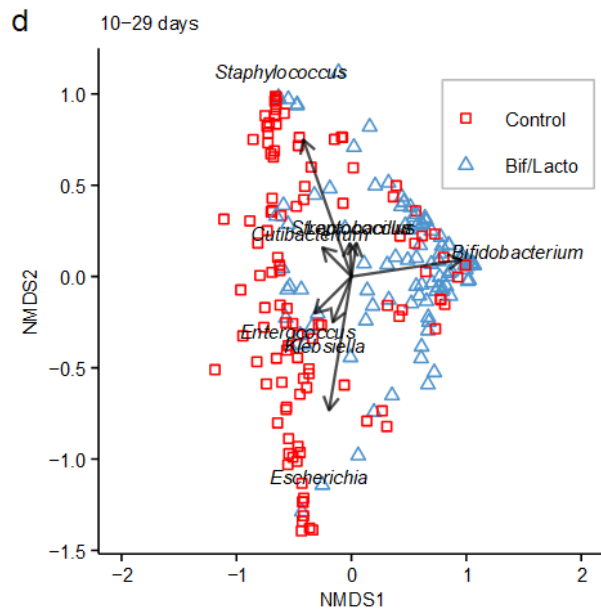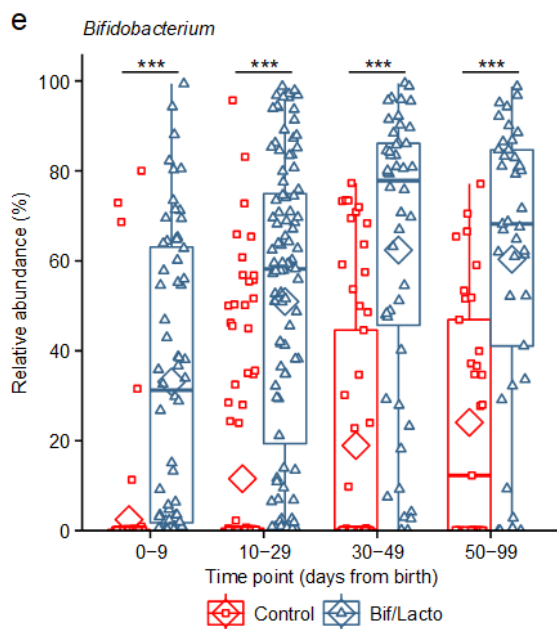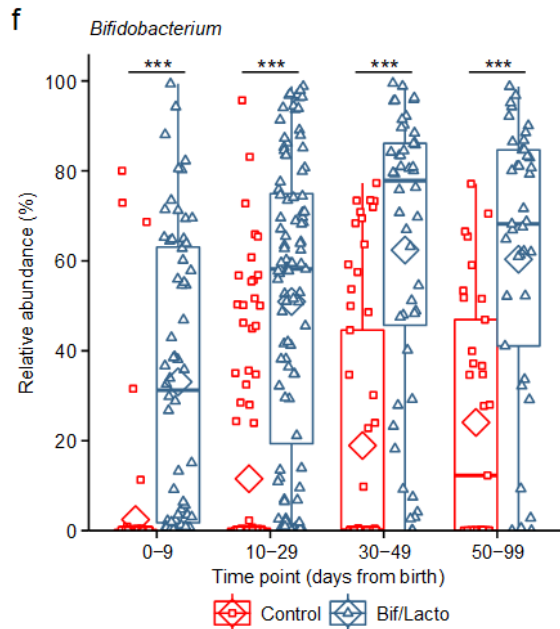

**Data S2 related to Figure 1. NMDS plots and Bifidobacterium relative abundance using data normalised with either mean log-transformation or variance-stabilizing transformation.**

(A) NMDS plot of fecal microbiota at 0-9 days with sequence data normalised using mean log-normalised transformation.

(B) NMDS plot of fecal microbiota at 10-29 days with sequence data normalised using mean log-normalised transformation.

(C) NMDS plot of fecal microbiota at 0-9 days with sequence data normalised using variance-stabilizing transformation.

(D) NMDS plot of fecal microbiota at 10-29 days with sequence data normalised using variance-stabilizing transformation.

(E) Bifidobacterium relative abundance with sequence data normalised using mean log-normalised transformation

(F) Bifidobacterium relative abundance with sequence data normalised using variance-stabilizing transformation.

Asterisks represent P values: \*P < 0.05, \*\*P < 0.01, \*\*\*P < 0.001.

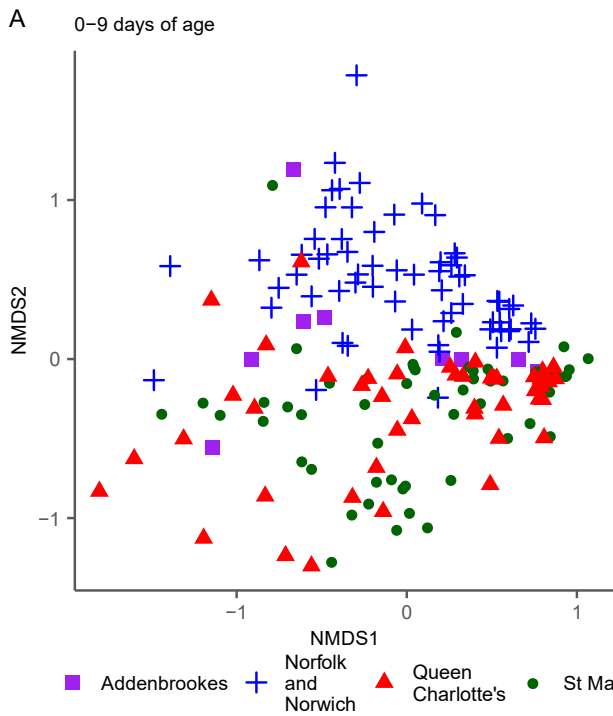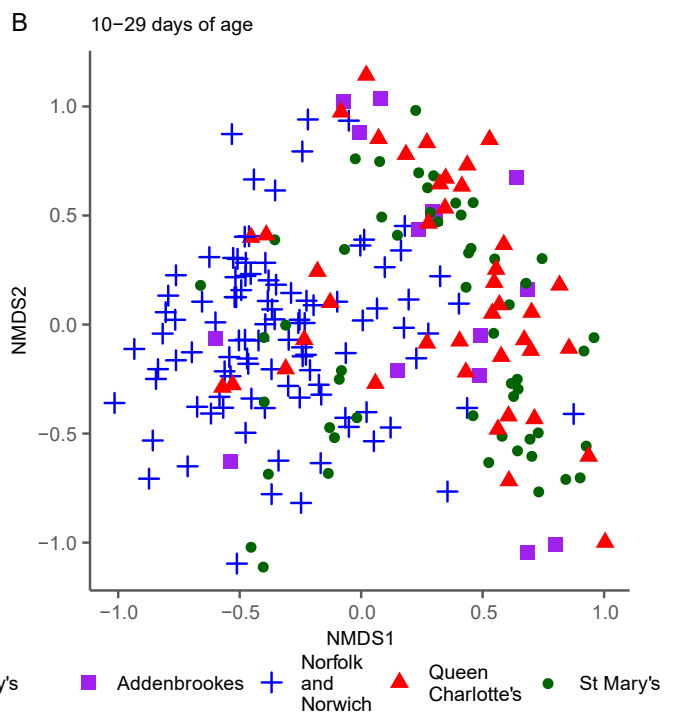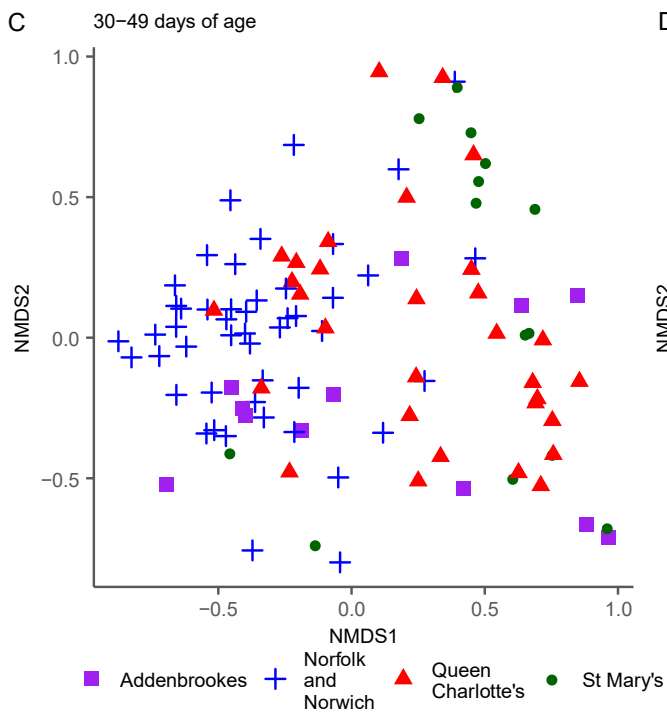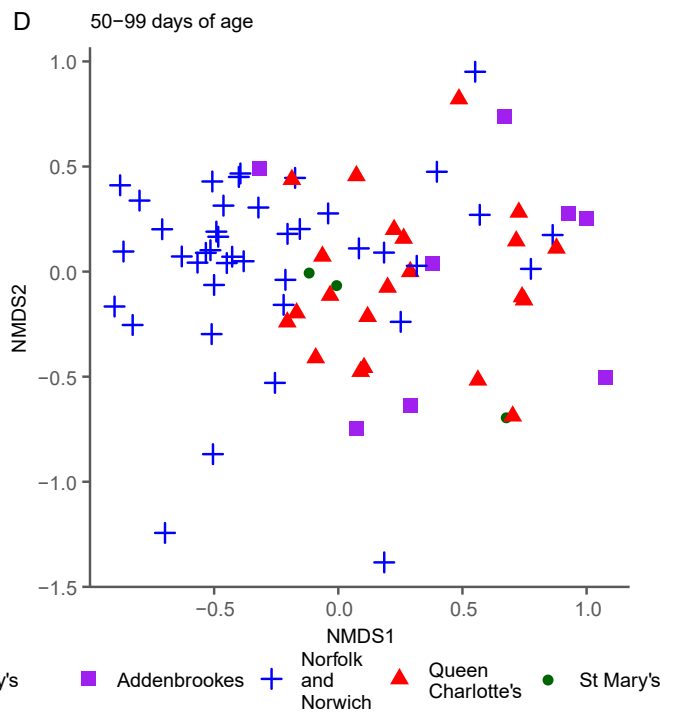

**Data S3 related to Figure 1. Non-metric multidimensional scaling (NMDS) comparing microbiota composition between individual Bif/Lacto (Norfolk and Norwich) and Control hospital NICUs.**

- (A) NMDS infant fecal microbiota composition compared by NICU at 0-9 days.
- (B) NMDS infant fecal microbiota composition compared by NICU at 10-29 days.
- (C) NMDS infant fecal microbiota composition compared by NICU at 30-49 days.
- (D) NMDS infant fecal microbiota composition compared by NICU at 50-99 days.

NMDS analysis clustered using Bray-Curtis dissimilarity.

Bif/Lacto group: Norfolk and Norwich. Control group: St Mary's, Queen Charlotte's, and Addenbrookes.

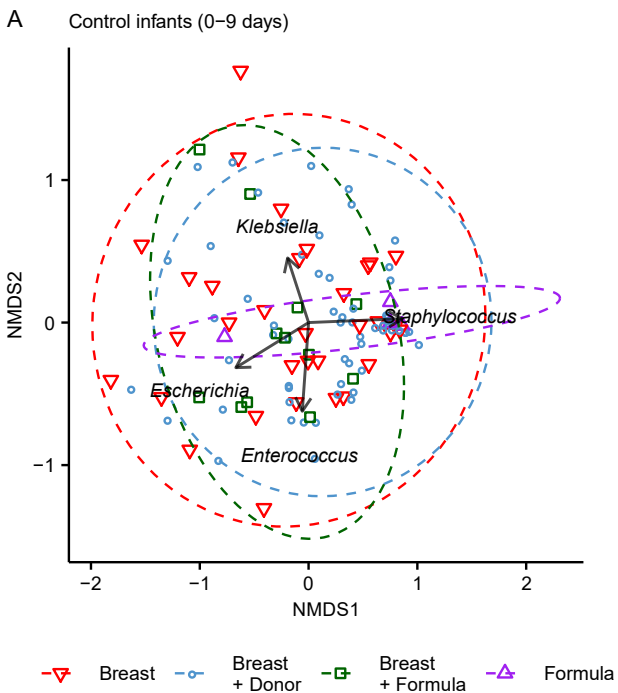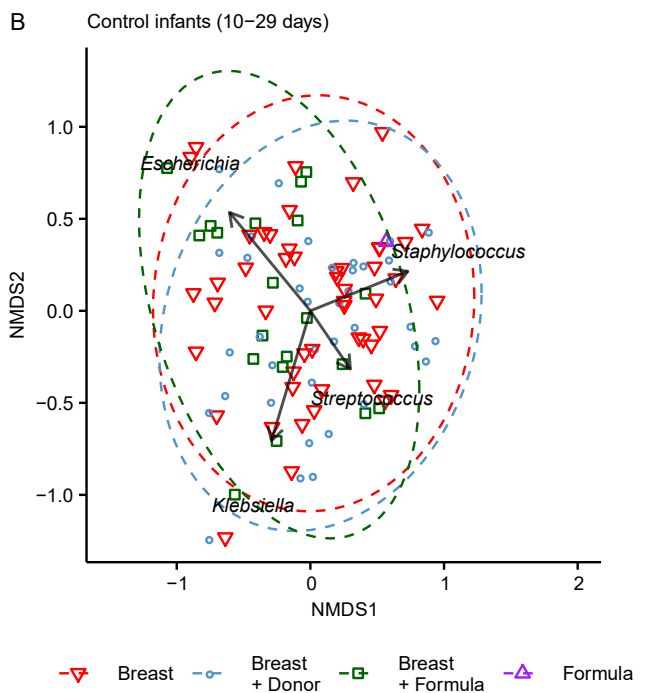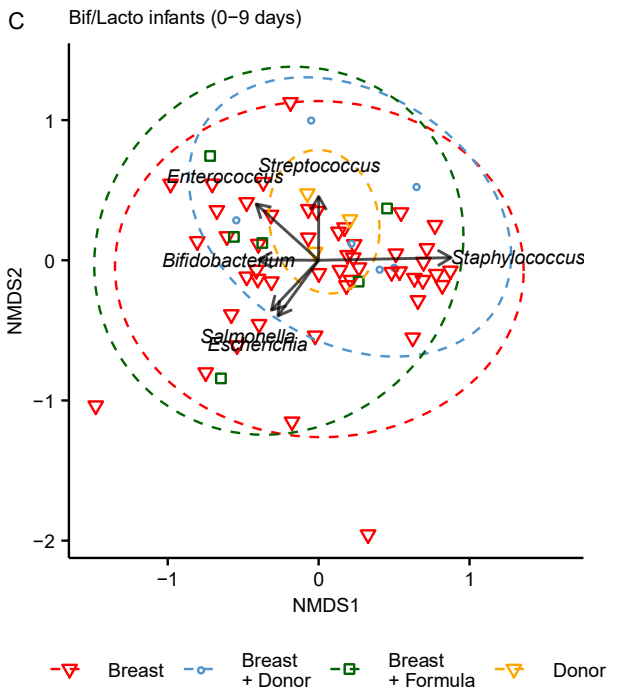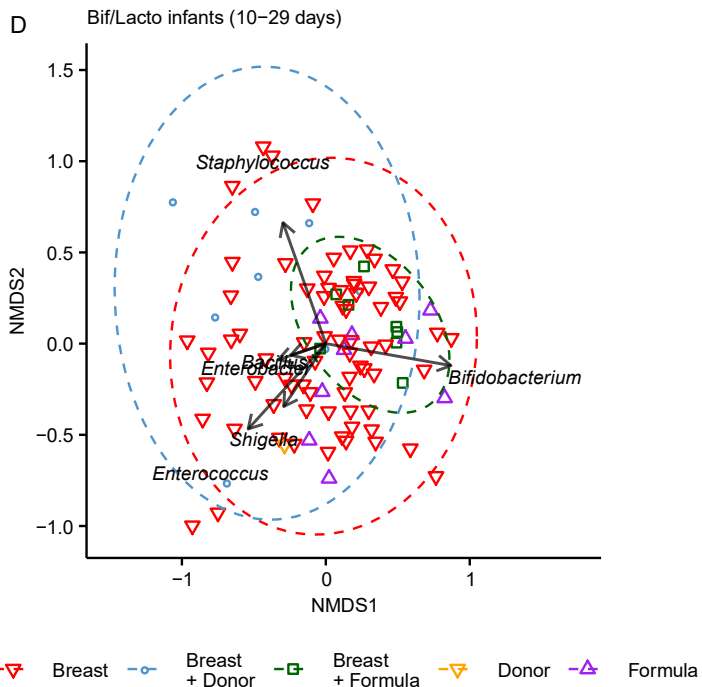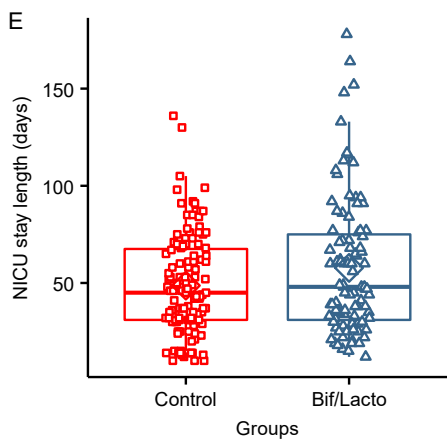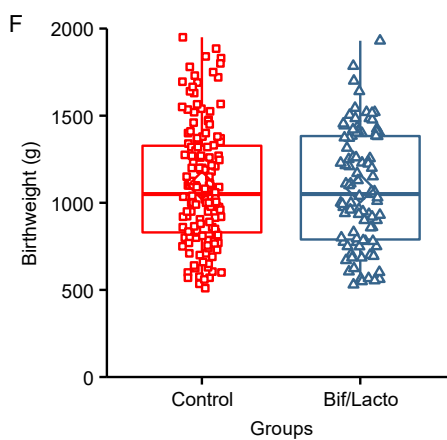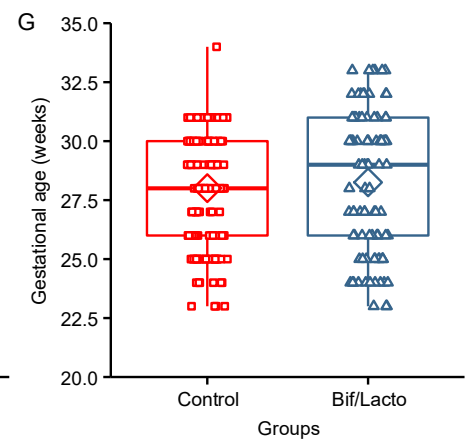

**Data S4 related to Figure 2. Effects of birthweight, antibiotics, delivery mode and diet on Bifidobacterium.**

(A) Control infant fecal microbiota composition compared by diet at 0-9 days.

(B) Control infant fecal microbiota composition compared by diet at 10-29 days.

(C) Bif/Lacto infant fecal microbiota composition compared by diet at 0-9 days.

(D) Bif/Lacto infant fecal microbiota composition compared by NICU at 10-29 days.

NMDS analysis clustered using Bray-Curtis dissimilarity. Ellipses show 95% confidence interval for each group.

(E) Length of infant stay in NICU.

(F) Infant birth weight.

(G) Infant gestational age at birth.

Box plots show mean (diamond) and median (solid line) with point showing individual infants.



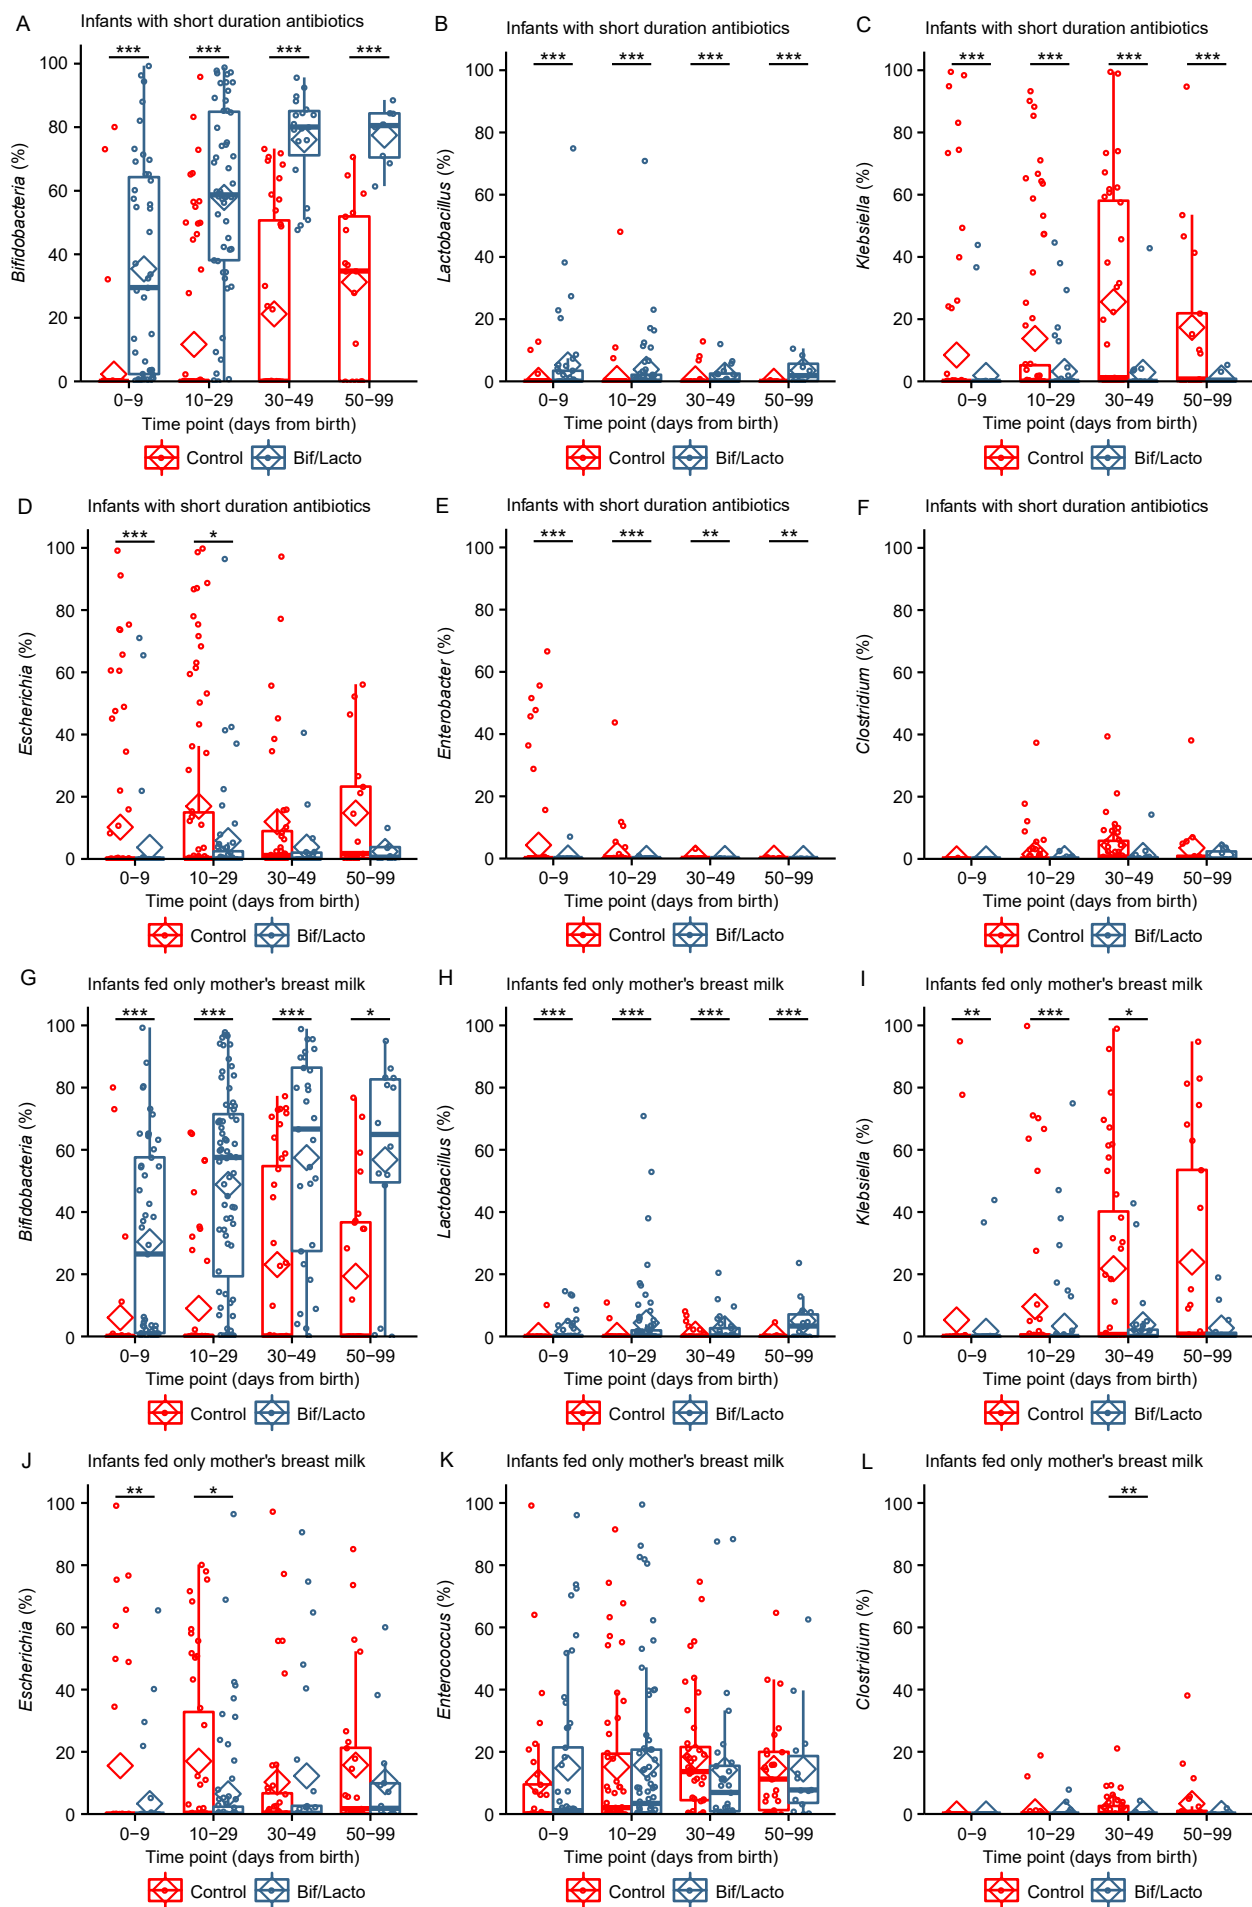

**Data S5 related to Figure 2. Sensitivity analysis of genus abundance restricted to only infants that received short duration antibiotic treatment or to infants that were only fed mothers' breast milk at time of sample collection.**

(A) Relative abundance of *Bifidobacterium*.

(B) Relative abundance of *Lactobacillus*.

(C) Relative abundance of *Klebsiella*.

(D) Relative abundance of *Escherichia*.

(E) Relative abundance of *Enterobacter*.

(F) Relative abundance of *Clostridium*.

(G) Relative abundance of *Bifidobacterium*.

(H) Relative abundance of *Lactobacillus*.

(I) Relative abundance of *Klebsiella*.

(J) Relative abundance of *Escherichia*.

(K) Relative abundance of *Enterobacter*.

(L) Relative abundance of *Clostridium*.

Individual points highlight individual infant samples, diamonds indicate the group mean, box plots show group median and interquartile range. Asterisks represent  $p$  values: \* =  $P < 0.05$ , \*\* =  $P < 0.01$  \*\*\* =  $P < 0.001$ .

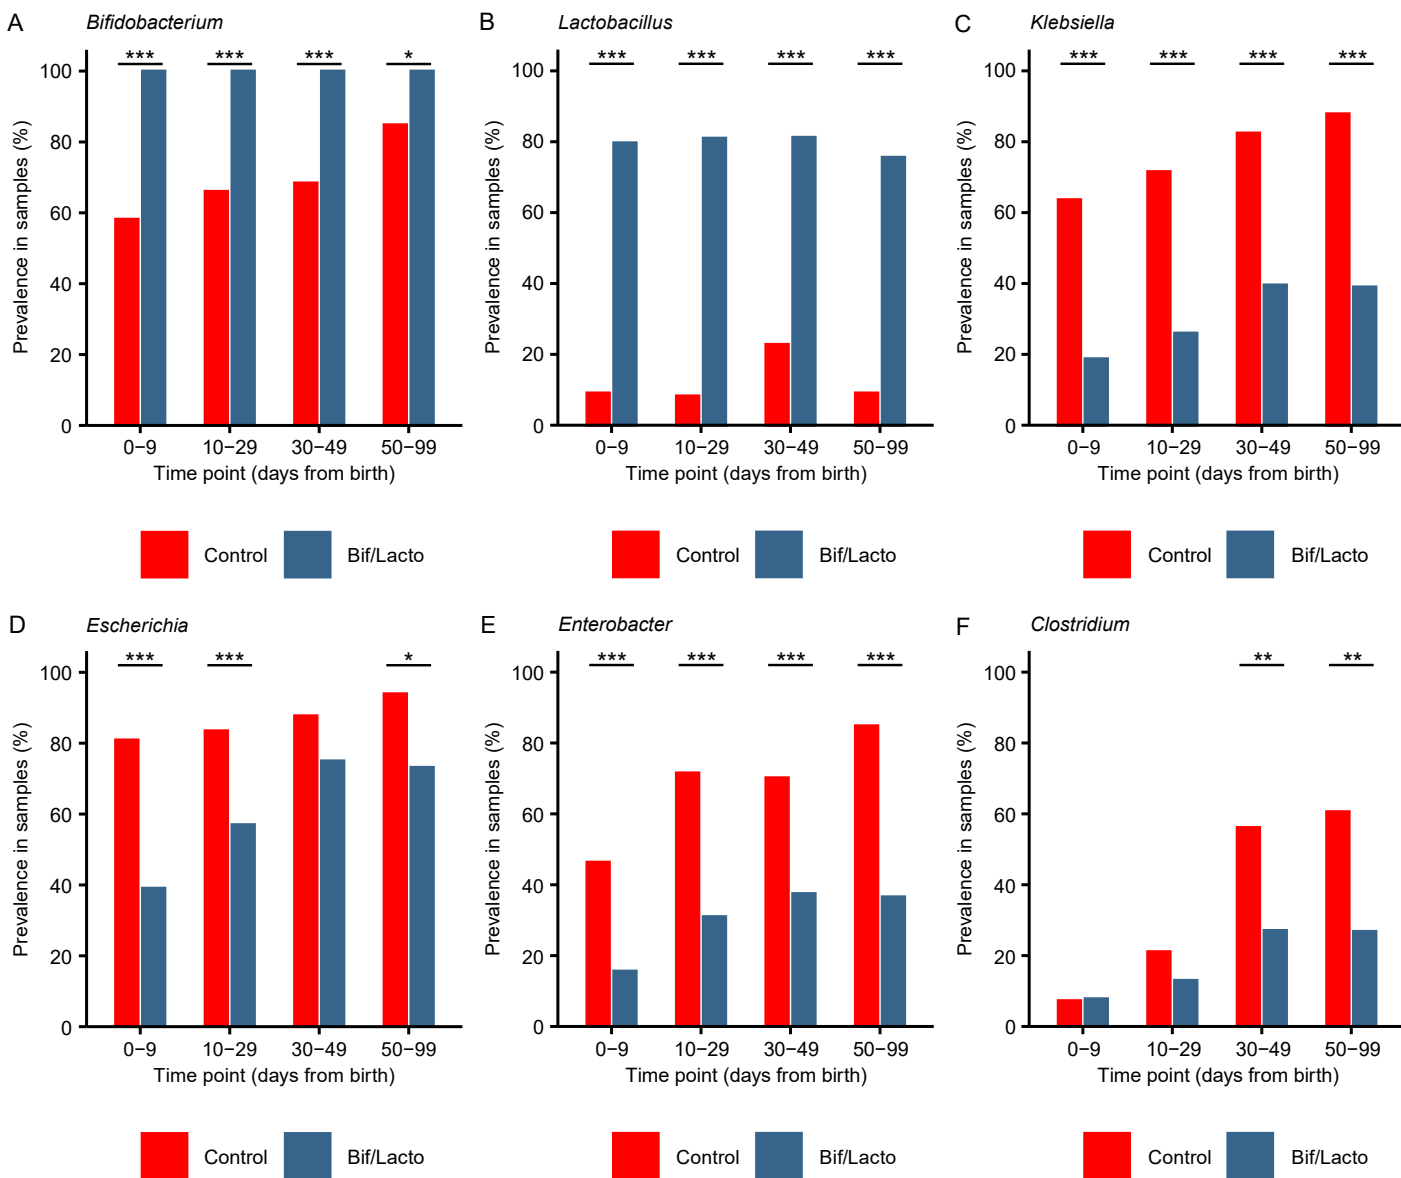

**Data S6 related to Figure 2. Prevalence of genus in infants.**

(A) Prevalence of *Bifidobacterium*.

(B) Prevalence of *Lactobacillus*.

(C) Prevalence of *Klebsiella*.

(D) Prevalence of *Escherichia*.

(E) Prevalence of *Enterobacter*.

(F) Prevalence of *Clostridium*.

Prevalence of a genus counted as one or more sequence read detected and absence counted as zero sequence read detected in each sample.

Significance tested using Fisher's Exact Test. Asterisks represent  $p$  values: \* =  $P < 0.05$ , \*\* =  $P < 0.01$  \*\*\* =  $P < 0.001$ .

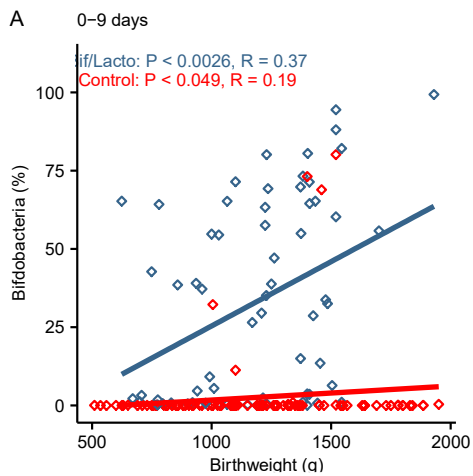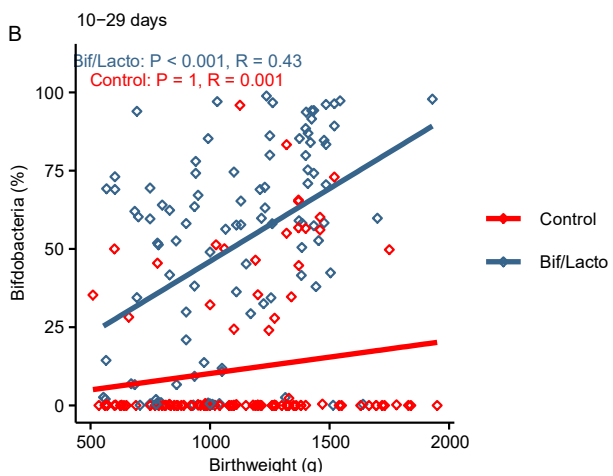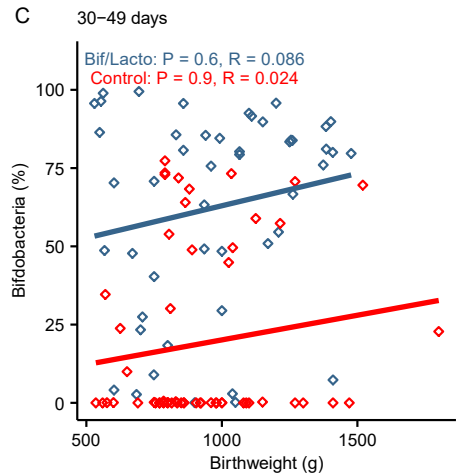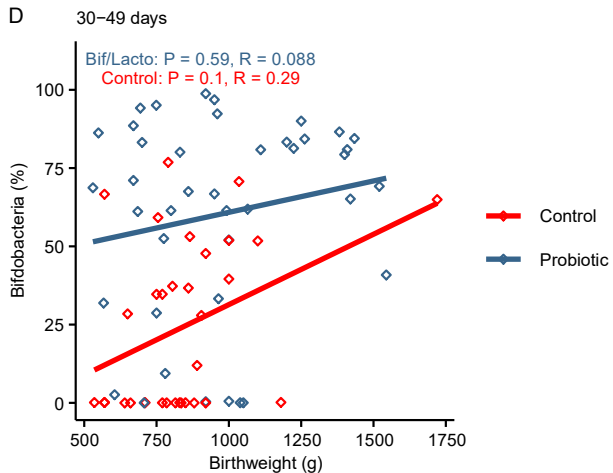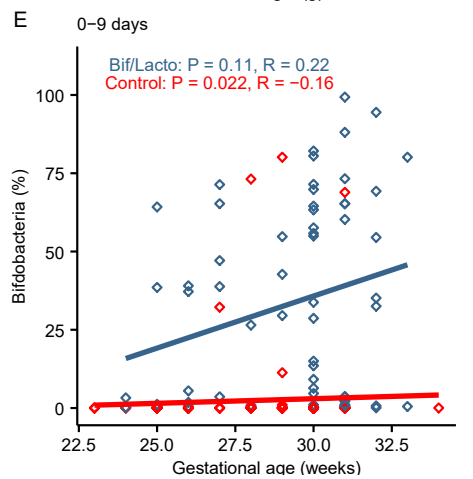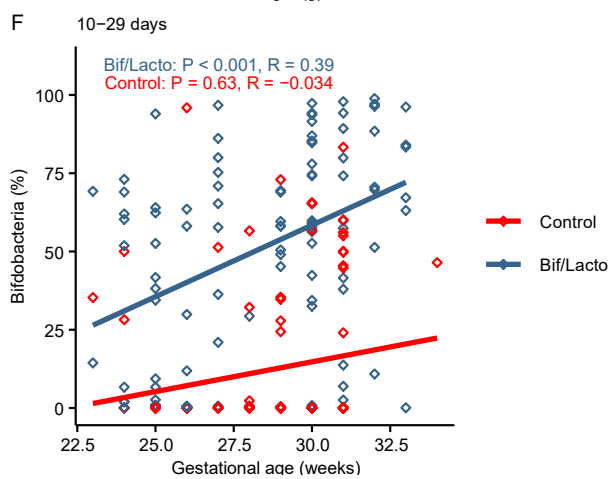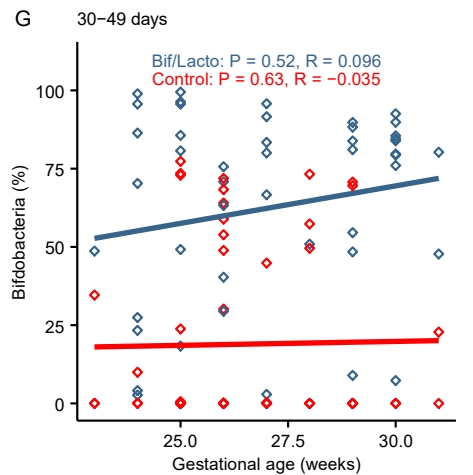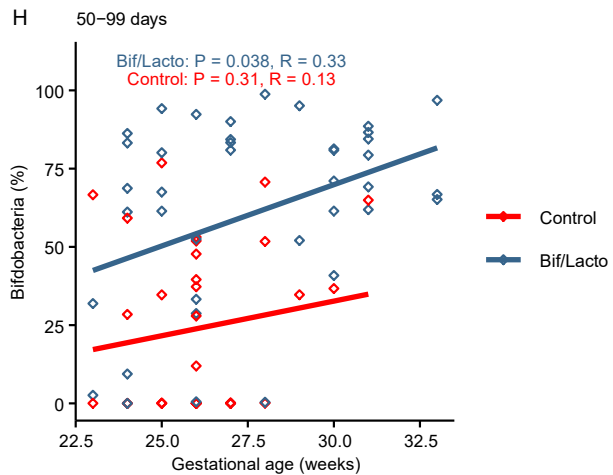

**Data S7 related to Figure 3. *Bifidobacterium* relative abundance plotted against birthweight or gestational age.**

- (A) *Bifidobacterium* relative abundance plotted against birth weight at 0-9 days.
- (B) *Bifidobacterium* relative abundance plotted against birth weight at 10-29 days.
- (C) *Bifidobacterium* relative abundance plotted against birth weight at 30-49 days.
- (D) *Bifidobacterium* relative abundance plotted against birth weight at 40-99 days.
- (E) *Bifidobacterium* relative abundance plotted against gestational age at 0-9 days.
- (F) *Bifidobacterium* relative abundance plotted against gestational age at 10-29 days.
- (G) *Bifidobacterium* relative abundance plotted against gestational age at 30-49 days.
- (H) *Bifidobacterium* relative abundance plotted against gestational age at 40-99 days.
